# Supplementary material for: Mendelian Randomization Analyses Suggest Childhood Body Size Indirectly Influences End Points From Across the Cardiovascular Disease Spectrum Through Adult Body Size
Source: PubMed Central journal article supplement — J Am Heart Assoc. 2021 Sep 1;10(17):e021503. doi: 10.1161/JAHA.121.021503 (PMC8649247; doi:10.1161/jaha.121.021503), 2021-09-01
Supplement: JAH3-10-e021503-s001.pdf [file JAH3-10-e021503-s001.pdf]

# **SUPPLEMENTAL MATERIAL**

**Table S1. Comparison of genome-wide effect estimates between early life and adult body size in the UK Biobank.**

| SNP         | Chromosome | Base position | Closest gene | Effect allele | Other allele | Beta (Adult) | SE (Adult) | P (Adult)  | Beta (Age 10) | SE (Age 10) | P (Age 10)  | Interaction P |
|-------------|------------|---------------|--------------|---------------|--------------|--------------|------------|------------|---------------|-------------|-------------|---------------|
| rs6938973   | 6          | 98421721      | MMS22L       | T             | C            | -0.0118066   | 0.00140063 | 3.5E-17    | 0.00589934    | 0.00143123  | 0.000038    | 9.86E-15      |
| rs12042908  | 1          | 74997762      | TNNI3K       | A             | G            | 0.0104426    | 0.00138041 | 3.9E-14    | 0.0274603     | 0.0014112   | 2.5E-84     | 7.27E-14      |
| rs13254613  | 8          | 64804804      | YTHDF3       | A             | C            | 0.00564903   | 0.00144394 | 0.000091   | -0.0125693    | 0.00147501  | 1.6E-17     | 1.71E-13      |
| rs78444298  | 1          | 184672098     | EDEM3        | G             | A            | -0.0166763   | 0.00498629 | 0.00082    | 0.042032      | 0.00509751  | 1.6E-16     | 1.03E-11      |
| rs9843653   | 3          | 49920571      | MST1R        | T             | C            | -0.0175503   | 0.00137056 | 1.5E-37    | -0.00406936   | 0.00140159  | 0.0037      | 1.29E-11      |
| rs77960     | 5          | 103964585     | NUDT12       | G             | A            | -0.00624158  | 0.00146057 | 0.000019   | -0.0105292    | 0.00149263  | 1.7E-12     | 1.93E-11      |
| rs4744246   | 9          | 96254464      | FAM120A      | A             | G            | 0.000944429  | 0.00144792 | 0.51       | -0.0157627    | 0.00147894  | 1.6E-26     | 2.38E-11      |
| rs1250597   | 10         | 81010250      | ZMIZ1        | A             | G            | -0.00853653  | 0.00139856 | 1E-09      | 0.00394057    | 0.00142889  | 0.0058      | 5.97E-10      |
| rs2725371   | 8          | 30854033      | PURG         | A             | G            | 0.0100376    | 0.0014969  | 2E-11      | -0.00346122   | 0.00152911  | 0.024       | 7.16E-10      |
| rs1320251   | 17         | 21264396      | KCNJ12       | C             | T            | 0.0123928    | 0.00138267 | 3.2E-19    | -0.00036868   | 0.00141185  | 0.79        | 9.27E-10      |
| rs7132908   | 12         | 50263148      | FAIM2        | G             | A            | -0.0186209   | 0.00141036 | 8.4E-40    | -0.0312648    | 0.00144009  | 1.6E-104    | 3.98E-09      |
| rs543874    | 1          | 177889480     | SEC16B       | A             | G            | -0.0301239   | 0.00169429 | 1E-70      | -0.0471181    | 0.00173208  | 6E-163      | 4.69E-09      |
| rs35957544  | 8          | 73440371      | KCNB2        | G             | T            | 0.0126785    | 0.00139004 | 7.4E-20    | 0.00133392    | 0.00141995  | 0.35        | 1.03E-08      |
| rs788858    | 4          | 82138300      | PRKG2        | A             | G            | 0.000576386  | 0.00151019 | 0.7        | 0.0122893     | 0.00154345  | 1.7E-15     | 1.54E-08      |
| rs10182458  | 2          | 25150641      | ADCY3        | A             | G            | -0.0199485   | 0.00136878 | 4.1E-48    | -0.0359119    | 0.00139965  | 3.5E-145    | 1.94E-08      |
| rs115319174 | 2          | 207066474     | GPR1         | G             | C            | -0.0113095   | 0.00296902 | 0.00014    | -0.0423448    | 0.00303598  | 3.3E-44     | 2.31E-08      |
| rs217672    | 14         | 62361021      | SYT16        | A             | C            | -0.0118089   | 0.00154676 | 2.3E-14    | 0.00101877    | 0.00157954  | 0.52        | 2.39E-08      |
| rs1770336   | 9          | 28414625      | LINGO2       | C             | T            | -0.0155163   | 0.00146443 | 3.1E-26    | -0.00384235   | 0.00149581  | 0.01        | 3.51E-08      |
| rs13292699  | 9          | 15910044      | CCDC171      | A             | C            | 0.0125361    | 0.00138627 | 1.5E-19    | -0.00147231   | 0.00141598  | 0.3         | 4.17E-08      |
| rs236660    | 7          | 75050086      | POM121C      | T             | C            | -0.0144693   | 0.00143954 | 9.1E-24    | -0.0012696    | 0.00147066  | 0.39        | 4.65E-08      |
| rs429358    | 19         | 45411941      | APOE         | T             | C            | 0.0160691    | 0.00190178 | 2.9E-17    | -0.00345424   | 0.00194151  | 0.075       | 0.00000105    |
| rs147730268 | 12         | 123024476     | KNTC1        | G             | T            | 0.0228315    | 0.00248522 | 4E-20      | -0.00115027   | 0.00253762  | 0.65        | 0.00000127    |
| rs2269610   | 6          | 33289935      | DAXX         | G             | C            | -0.0127637   | 0.00176726 | 5.1E-13    | 0.00177773    | 0.00180586  | 0.32        | 0.00000155    |
| rs2999158   | 1          | 113239478     | MOV10        | T             | C            | -0.00326079  | 0.0014499  | 0.025      | 0.00886901    | 0.00148224  | 2.2E-09     | 0.00000175    |
| rs4806814   | 19         | 1860147       | KLF16        | G             | A            | 0.0126512    | 0.00190443 | 3.1E-11    | -0.0020999    | 0.00194422  | 0.28        | 0.00000296    |
| rs2767486   | 1          | 65991203      | LEPR         | A             | A            | -0.00136324  | 0.0017049  | 0.42       | -0.0153659    | 0.00174293  | 1.2E-18     | 0.00000419    |
| rs60644673  | 7          | 100906742     | NYAP1        | G             | T            | -0.00406274  | 0.00173954 | 0.02       | 0.0100289     | 0.00177714  | 0.000000017 | 0.00000419    |
| rs3426097   | 6          | 100727703     | SIM1         | T             | G            | -0.00236251  | 0.00164269 | 0.15       | -0.0178193    | 0.00167858  | 2.5E-26     | 0.00000438    |
| rs72910629  | 6          | 69761994      | BAI3         | A             | G            | -0.0132548   | 0.00201085 | 4.3E-11    | 0.00225962    | 0.00205477  | 0.27        | 0.0000007     |
| rs7206608   | 16         | 82872628      | CDH13        | C             | G            | -0.00978895  | 0.00146872 | 2.6E-11    | 0.0000455     | 0.00150014  | 0.98        | 0.00000711    |
| rs59227842  | 11         | 43692423      | HSD17B12     | A             | G            | -0.0152449   | 0.00149355 | 1.8E-24    | -0.000569076  | 0.00152569  | 0.71        | 0.00000081    |
| rs6265      | 11         | 27679916      | BDNF         | C             | T            | 0.0245417    | 0.00175291 | 1.5E-44    | 0.0117028     | 0.00179063  | 6.3E-11     | 0.000000817   |
| rs12253527  | 10         | 21819824      | MLLT10       | G             | A            | -0.0136135   | 0.00146958 | 2E-20      | -0.00000961   | 0.00150144  | 0.99        | 0.000000877   |
| rs13186637  | 5          | 153108558     | GRIA1        | T             | C            | 0.00868308   | 0.00144114 | 1.7E-09    | -0.00064613   | 0.00147277  | 0.66        | 0.000000973   |
| rs17716502  | 8          | 116659731     | TRPS1        | C             | T            | 0.0162355    | 0.00171408 | 2.7E-21    | 0.00470841    | 0.00175096  | 0.0072      | 0.00000105    |
| rs12538826  | 7          | 99030028      | PTCD1        | T             | C            | 0.0167586    | 0.00215398 | 7.2E-15    | -0.00143349   | 0.00220054  | 0.51        | 0.00000127    |
| rs7424120   | 2          | 59313974      | FANCL        | C             | T            | 0.0142008    | 0.0014016  | 4E-24      | 0.00397895    | 0.00143321  | 0.0055      | 0.00000139    |
| rs149457    | 5          | 107438057     | FBXL17       | C             | T            | 0.0150324    | 0.00182987 | 2.1E-16    | 0.00198417    | 0.00187003  | 0.29        | 0.00000141    |
| rs113569731 | 3          | 47093206      | SETD2        | C             | A            | -0.0151686   | 0.00241102 | 3.1E-10    | -0.000292565  | 0.00246561  | 0.91        | 0.00000191    |
| rs62259692  | 3          | 51847709      | IQCF3        | G             | A            | -0.0177511   | 0.00293025 | 1.4E-09    | 0.00133971    | 0.00299659  | 0.65        | 0.00000235    |
| rs9421249   | 10         | 118623322     | ENO4         | G             | T            | -0.0104412   | 0.00156447 | 2.5E-11    | 0.00149155    | 0.00159839  | 0.35        | 0.00000267    |
| rs1000471   | 15         | 89986583      | RHCG         | C             | T            | 0.000909527  | 0.00168998 | 0.59       | -0.00950759   | 0.00172531  | 0.000000036 | 0.00000303    |
| rs181617194 | 12         | 122011598     | KDM2B        | T             | C            | 0.0226623    | 0.00376431 | 1.7E-09    | 0.000121726   | 0.00384367  | 0.97        | 0.00000335    |
| rs6577497   | 1          | 8605667       | RERE         | A             | T            | -0.00220462  | 0.00140295 | 0.12       | 0.00807228    | 0.00143424  | 0.000000018 | 0.00000335    |
| rs7424771   | 2          | 161276378     | RBMS1        | G             | A            | -0.00230822  | 0.0013764  | 0.094      | 0.00893011    | 0.00140744  | 2.2E-10     | 0.00000402    |
| rs12033257  | 1          | 112318484     | KCND3        | A             | G            | 0.00980287   | 0.0014192  | 4.9E-12    | -0.000757207  | 0.00145086  | 0.6         | 0.00000414    |
| rs1840660   | 7          | 114352615     | FOX2         | G             | A            | -0.0095498   | 0.00141493 | 2E-22      | 0.00143567    | 0.00144551  | 0.32        | 0.00000537    |
| rs2594994   | 3          | 11339960      | ATG7         | T             | G            | 0.00210708   | 0.0017896  | 0.24       | 0.015449      | 0.00183012  | 3.1E-17     | 0.00000552    |
| rs4077093   | 12         | 51593616      | POUGF1       | T             | G            | 0.00969144   | 0.00167974 | 7.9E-09    | 0.000465637   | 0.00171515  | 0.79        | 0.00000556    |
| rs7893571   | 10         | 16750129      | RSU1         | G             | T            | -0.0101768   | 0.00145748 | 2.9E-12    | -0.00193319   | 0.00148908  | 0.19        | 0.00000609    |
| rs473837    | 8          | 6096881       | CA8          | G             | T            | 0.00863143   | 0.00143586 | 1.8E-09    | -0.00100543   | 0.00146675  | 0.49        | 0.00000693    |
| rs11134512  | 5          | 167847460     | WWC1         | T             | G            | 0.00824166   | 0.00146708 | 1.9E-08    | 0.00111736    | 0.00149928  | 0.46        | 0.00000723    |
| rs6950388   | 7          | 1270699       | UNCX         | G             | A            | -0.00945149  | 0.00169839 | 2.6E-08    | 0.00114819    | 0.0017351   | 0.51        | 0.00000806    |
| rs1411432   | 9          | 16728532      | BNC2         | A             | C            | -0.0124381   | 0.00176815 | 2E-12      | 0.00149441    | 0.00180604  | 0.41        | 0.00000924    |
| rs10960276  | 9          | 11819686      | TYRP1        | C             | A            | 0.00809436   | 0.00143164 | 1.6E-08    | -0.00233632   | 0.00146232  | 0.11        | 0.00000952    |
| rs7570446   | 2          | 193801010     | TMEFF2       | C             | A            | -0.00780228  | 0.00137254 | 1.3E-08    | 0.00206294    | 0.00140349  | 0.14        | 0.00000985    |
| rs1454687   | 3          | 94038085      | NSUN3        | C             | G            | 0.0122831    | 0.00136952 | 3E-19      | 0.00123916    | 0.00140053  | 0.38        | 0.00000997    |
| rs4660586   | 1          | 42407229      | HIVEP3       | C             | T            | 0.00896084   | 0.00156363 | 0.00000001 | -0.00062795   | 0.00159851  | 0.69        | 0.00001       |
| rs11691869  | 2          | 100805996     | AFF3         | C             | A            | 0.0112311    | 0.00142704 | 3.5E-15    | -0.000364773  | 0.00145922  | 0.8         | 0.0000101     |
| rs61971082  | 13         | 86494667      | SLITRK6      | T             | G            | -0.0101252   | 0.00152324 | 3E-11      | 0.000162024   | 0.00155575  | 0.92        | 0.0000122     |
| rs2678204   | 1          | 201800511     | IPO9         | T             | G            | -0.0150162   | 0.00144491 | 2.7E-25    | -0.00575098   | 0.00147714  | 0.000099    | 0.0000125     |
| rs7548936   | 1          | 91207757      | BARHL2       | G             | C            | -0.00848296  | 0.00141586 | 2.1E-09    | 0.00185106    | 0.00144744  | 0.2         | 0.0000127     |
| rs809955    | 4          | 140874760     | MAML3        | G             | A            | 0.0101003    | 0.00142485 | 1.4E-12    | -0.000730481  | 0.00145623  | 0.62        | 0.0000127     |
| rs7433076   | 3          | 90234502      | EPHA3        | T             | A            | 0.00951719   | 0.00137849 | 5.1E-12    | -0.00091675   | 0.0014097   | 0.52        | 0.0000131     |
| rs13427822  | 2          | 213414265     | ERBB4        | A             | G            | 0.0094934    | 0.00155587 | 1.3E-09    | -0.000583709  | 0.00159095  | 0.71        | 0.0000137     |
| rs3814883   | 16         | 29994922      | TAOK2        | C             | T            | -0.014757    | 0.00137637 | 8.1E-27    | -0.00608707   | 0.00140582  | 0.000015    | 0.0000138     |
| rs2433733   | 2          | 230816703     | FBXO36       | G             | A            | 0.010504     | 0.00146427 | 7.3E-13    | 0.000690913   | 0.00149729  | 0.64        | 0.0000139     |
| rs11642387  | 16         | 6753239       | RBFOX1       | A             | G            | 0.0128653    | 0.00229443 | 2.1E-08    | -0.00220489   | 0.00234351  | 0.35        | 0.0000165     |
| rs4658403   | 1          | 243832560     | AKT3         | C             | T            | 0.0136423    | 0.00183985 | 1.2E-13    | 0.0000935     | 0.00188089  | 0.96        | 0.0000168     |
| rs11708540  | 3          | 70593081      | FOXP1        | G             | A            | -0.0106156   | 0.00189063 | 0.00000002 | 0.00206605    | 0.00193343  | 0.29        | 0.0000174     |
| rs403694    | 21         | 46567625      | ADARB1       | C             | T            | -0.0121794   | 0.00138306 | 1.3E-18    | -0.00186034   | 0.00141136  | 0.19        | 0.0000182     |
| rs72976986  | 19         | 4050424       | ZBTB7A       | G             | A            | 0.0138512    | 0.00176589 | 4.4E-15    | 0.0006307     | 0.00180278  | 0.73        | 0.0000212     |
| rs117911387 | 9          | 130446836     | STXB1P1      | G             | A            | -0.00367597  | 0.00326088 | 0.26       | -0.0245792    | 0.00333076  | 1.6E-13     | 0.0000227     |
| rs55931203  | 17         | 65854602      | BPTF         | C             | T            | -0.0125644   | 0.00177792 | 1.6E-12    | -0.00191964   | 0.00181544  | 0.29        | 0.0000234     |
| rs4419475   | 4          | 96150044      | UNC5C        | A             | T            | -0.00809618  | 0.00139493 | 6.5E-09    | 0.00115585    | 0.00142565  | 0.42        | 0.0000261     |
| rs116195355 | 1          | 39941508      | MACF1        | C             | A            | 0.0259588    | 0.00396473 | 5.9E-11    | 0.00409363    | 0.00405317  | 0.31        | 0.0000262     |
| rs409696    | 2          | 147900651     | ACVR2A       | G             | A            | 0.0114218    | 0.00138666 | 1.8E-16    | 0.00154584    | 0.00141793  | 0.28        | 0.0000283     |

|             |    |           |              |   |   |              |            |            |              |            |             |             |
|-------------|----|-----------|--------------|---|---|--------------|------------|------------|--------------|------------|-------------|-------------|
| rs73213484  | 4  | 28489339  | RP11-180C1.1 | A | T | 0.0146376    | 0.00197063 | 1.1E-13    | 0.00124259   | 0.00201403 | 0.54        | 0.0000302   |
| rs10927006  | 1  | 243557659 | SDCCAG8      | T | C | 0.0119925    | 0.00195352 | 8.3E-10    | 0.000884198  | 0.0019971  | 0.66        | 0.0000309   |
| rs1977658   | 1  | 107607037 | PRMT6        | T | G | 0.00810079   | 0.00145332 | 2.5E-08    | -0.00096635  | 0.00148574 | 0.52        | 0.0000315   |
| rs10499014  | 6  | 97947755  | MMS22L       | C | G | 0.0100464    | 0.00155554 | 1.1E-10    | -0.000664623 | 0.00158952 | 0.68        | 0.0000354   |
| rs2237025   | 4  | 55541879  | KIT          | T | C | 0.0102433    | 0.00139113 | 1.8E-13    | -0.000288029 | 0.00142177 | 0.84        | 0.0000359   |
| rs2164300   | 4  | 67813017  | CENPC        | C | T | 0.00754945   | 0.00137666 | 4.2E-08    | -0.00126483  | 0.00140698 | 0.37        | 0.0000366   |
| rs8192675   | 3  | 170724883 | SLC2A2       | T | C | -0.0117042   | 0.00150889 | 8.7E-15    | -0.000768842 | 0.00154305 | 0.62        | 0.0000385   |
| rs55880046  | 16 | 19941557  | GPRC5B       | T | G | 0.0168634    | 0.00196315 | 8.7E-18    | 0.0298545    | 0.00200515 | 3.9E-50     | 0.0000386   |
| rs11782074  | 8  | 142617096 | AC138647.1   | G | T | -0.00971808  | 0.00143319 | 1.2E-11    | 0.000824495  | 0.00146403 | 0.57        | 0.0000414   |
| rs9395520   | 6  | 13183523  | PHACTR1      | C | T | 0.00975752   | 0.00149027 | 5.9E-11    | 0.000665362  | 0.00152282 | 0.66        | 0.000042    |
| rs601338    | 19 | 49206674  | FUT2         | G | A | 0.000916599  | 0.00137129 | 0.5        | 0.00938062   | 0.00139994 | 2.1E-11     | 0.0000442   |
| rs12357890  | 10 | 99762693  | CRTAC1       | A | G | -0.0121927   | 0.00138837 | 1.6E-18    | -0.00152667  | 0.00141848 | 0.28        | 0.000048    |
| rs117903946 | 16 | 67449639  | ZDHHC1       | G | A | -0.0097792   | 0.00386646 | 0.011      | -0.0322531   | 0.00394917 | 3.2E-16     | 0.0000556   |
| rs62106258  | 2  | 417167    | FAM150B      | T | C | 0.0591385    | 0.00318191 | 4.2E-77    | 0.0802051    | 0.00325367 | 3.6E-134    | 0.0000625   |
| rs8134638   | 21 | 40644170  | BRWD1        | T | C | -0.00779677  | 0.00142034 | 0.00000004 | 0.000768208  | 0.00149491 | 0.6         | 0.0000661   |
| rs34517439  | 1  | 78450517  | DNABJ4       | C | A | -0.0246975   | 0.00211727 | 1.9E-31    | -0.0137682   | 0.00216445 | 2E-10       | 0.0000685   |
| rs35852935  | 4  | 17991522  | LORL         | A | C | -0.0218858   | 0.00374062 | 4.9E-09    | 0.000639291  | 0.00382301 | 0.87        | 0.0000693   |
| rs10973159  | 9  | 36992547  | PAX5         | G | T | -0.00805227  | 0.00141346 | 1.2E-08    | 0.00174034   | 0.00144375 | 0.23        | 0.0000701   |
| rs4916229   | 1  | 171443368 | PRRC2C       | C | G | -0.0151299   | 0.00233311 | 8.9E-11    | 0.000377044  | 0.00238515 | 0.87        | 0.0000707   |
| rs10774018  | 12 | 2157925   | CACNA1C      | G | C | -0.0094769   | 0.00165987 | 1.1E-08    | -0.00231586  | 0.00169486 | 0.17        | 0.0000716   |
| rs3737992   | 1  | 33234128  | KIAA1522     | G | A | 0.0137318    | 0.00182503 | 5.3E-14    | 0.00307401   | 0.00186573 | 0.099       | 0.0000716   |
| rs78369934  | 17 | 61739101  | MAP3K3       | T | C | 0.0199362    | 0.00304655 | 6.6E-11    | -0.00344213  | 0.00311083 | 0.27        | 0.0000727   |
| rs10185199  | 2  | 40282202  | SLC8A1       | G | A | 0.00999545   | 0.00156387 | 1.6E-10    | 0.000100347  | 0.00159914 | 0.95        | 0.0000747   |
| rs10805383  | 5  | 63034606  | HTR1A        | G | A | -0.0104667   | 0.00137409 | 2.6E-14    | -0.001566    | 0.00140425 | 0.26        | 0.0000806   |
| rs7306710   | 12 | 66376091  | HMGGA2       | T | C | 0.000734811  | 0.00138144 | 0.59       | 0.00996644   | 0.00141056 | 1.6E-12     | 0.0000809   |
| rs6507054   | 18 | 31248323  | ASXL3        | T | C | -0.00928368  | 0.00139315 | 2.7E-11    | 0.000859588  | 0.00142239 | 0.55        | 0.0000821   |
| rs4572029   | 10 | 70889053  | VPS26A       | A | G | -0.000721662 | 0.00171259 | 0.67       | 0.0111075    | 0.00174972 | 2.2E-10     | 0.0000862   |
| rs34898535  | 16 | 31025641  | STX1B        | C | T | 0.0143098    | 0.00141495 | 4.8E-24    | 0.00667281   | 0.00144522 | 0.0000039   | 0.0000894   |
| rs9515446   | 13 | 112217108 | RP11-65D24.2 | A | G | -0.00969209  | 0.00138007 | 2.2E-12    | -0.000458885 | 0.00140953 | 0.74        | 0.0000922   |
| rs2056477   | 7  | 2079744   | MAD1L1       | G | T | 0.0115643    | 0.00163545 | 1.5E-12    | 0.00289922   | 0.0017081  | 0.083       | 0.0000926   |
| rs9366863   | 6  | 34688946  | C6orf106     | T | C | 0.0173843    | 0.00145749 | 8.5E-33    | 0.00754408   | 0.00148933 | 0.00000041  | 0.0000943   |
| rs1017529   | 17 | 27912415  | GIT1         | C | A | -0.0106224   | 0.00183966 | 7.7E-09    | -0.00093032  | 0.00187847 | 0.62        | 0.0000959   |
| rs396354    | 2  | 86850022  | CHMP3        | T | C | 0.0103984    | 0.0015204  | 8E-12      | 0.0013629    | 0.00155469 | 0.38        | 0.0000981   |
| rs61217499  | 12 | 108417780 | WSCD2        | G | C | 0.0127589    | 0.00167171 | 2.3E-14    | 0.00159702   | 0.00170695 | 0.35        | 0.000109213 |
| rs151252883 | 2  | 228998026 | SPHKAP       | T | C | -0.00921571  | 0.00144166 | 1.6E-10    | -0.00190531  | 0.00147417 | 0.2         | 0.000120473 |
| rs412243    | 16 | 339672    | AXIN1        | T | C | 0.0104789    | 0.00141618 | 1.4E-13    | 0.00408455   | 0.00144647 | 0.0047      | 0.000132466 |
| rs262956    | 3  | 183486117 | YEATS2       | T | G | 0.00911918   | 0.00143655 | 2.2E-10    | 0.00142997   | 0.00146908 | 0.33        | 0.000141612 |
| rs71495049  | 10 | 34014435  | PARD3        | G | A | -0.0170656   | 0.00247827 | 5.7E-12    | -0.00034582  | 0.002532   | 0.89        | 0.000144836 |
| rs3759584   | 14 | 103990799 | CKB          | T | C | 0.009739     | 0.00143449 | 1.1E-11    | 0.000275608  | 0.00146488 | 0.85        | 0.000152674 |
| rs4425224   | 3  | 56249398  | ERC2         | C | A | 0.0124424    | 0.00223714 | 2.7E-08    | -0.00011864  | 0.00228779 | 0.96        | 0.00015344  |
| rs2837398   | 21 | 41427168  | DSCAM        | A | C | -0.00819988  | 0.00140095 | 4.8E-09    | 0.00138608   | 0.00142962 | 0.33        | 0.000163603 |
| rs4671328   | 2  | 58935282  | FANCL        | T | G | 0.0131699    | 0.00138617 | 2.1E-21    | 0.00562223   | 0.00141743 | 0.000073    | 0.000175851 |
| rs6575340   | 14 | 94023972  | UNC79        | G | A | -0.0133217   | 0.00142984 | 1.2E-20    | -0.00569274  | 0.00146014 | 0.000097    | 0.000181139 |
| rs10160769  | 11 | 76474827  | TSKU         | G | C | 0.00918268   | 0.00168019 | 4.6E-08    | -0.000987279 | 0.00171634 | 0.57        | 0.000192773 |
| rs270689    | 6  | 104790532 | HACE1        | A | T | -0.0101052   | 0.00171918 | 4.2E-09    | -0.000649021 | 0.00175674 | 0.71        | 0.000201214 |
| rs2958542   | 11 | 62181882  | SCGB1A1      | C | T | 0.000350902  | 0.00143322 | 0.81       | 0.00823945   | 0.00146406 | 0.00000018  | 0.000201884 |
| rs28726372  | 1  | 84533839  | TLL7         | T | C | -0.00907801  | 0.00148344 | 9.4E-10    | -0.001432    | 0.00151653 | 0.35        | 0.000206214 |
| rs7601895   | 2  | 55281901  | RTN4         | C | G | 0.0103104    | 0.00148708 | 4.1E-12    | 0.000278247  | 0.00152061 | 0.85        | 0.000209617 |
| rs9477762   | 6  | 18507853  | RNF144B      | A | T | -0.0201859   | 0.00305238 | 3.8E-11    | 0.000271923  | 0.00311905 | 0.93        | 0.000212647 |
| rs112898427 | 2  | 67561335  | ETAA1        | C | T | 0.00104054   | 0.00151548 | 0.49       | 0.0103395    | 0.00154965 | 2.5E-11     | 0.000215316 |
| rs10503555  | 8  | 15763818  | TUSC3        | A | G | -0.000646069 | 0.00138509 | 0.64       | 0.0077774    | 0.00141489 | 0.000000039 | 0.000222604 |
| rs28408562  | 15 | 60917079  | RORA         | C | G | -0.00784012  | 0.00137968 | 1.3E-08    | 0.0000407    | 0.00140853 | 0.98        | 0.00022643  |
| rs8011566   | 14 | 42939471  | LRFN5        | T | A | -0.00873021  | 0.00139086 | 3.5E-10    | -0.000688592 | 0.00142033 | 0.63        | 0.000233642 |
| rs7321285   | 13 | 54319327  | OLFM4        | A | C | 0.0113478    | 0.00171932 | 4.1E-11    | 0.00146088   | 0.00175602 | 0.41        | 0.000244918 |
| rs7958241   | 12 | 49509262  | LMBRL1       | A | G | -0.00498997  | 0.00144519 | 0.00055    | -0.0130618   | 0.00147566 | 8.6E-19     | 0.000244933 |
| rs11079849  | 17 | 47090785  | IGF2BP1      | C | T | 0.0122339    | 0.00146379 | 6.4E-17    | 0.00141712   | 0.00149467 | 0.34        | 0.000246864 |
| rs13104584  | 4  | 80811227  | ANTXR2       | G | A | -0.00864396  | 0.00139769 | 6.2E-10    | -0.000193276 | 0.00142848 | 0.89        | 0.000249312 |
| rs10169594  | 2  | 41637688  | C2orf91      | T | C | -0.00788339  | 0.0014266  | 3.3E-08    | -0.000454997 | 0.00145877 | 0.76        | 0.000256988 |
| rs58351927  | 17 | 5297038   | NUP88        | A | G | -0.0101443   | 0.0014973  | 1.2E-11    | -0.00016717  | 0.0015289  | 0.91        | 0.000268478 |
| rs824207    | 15 | 24007729  | NDN          | A | G | -0.00220679  | 0.00137526 | 0.11       | -0.00930969  | 0.00140401 | 3.3E-11     | 0.000268808 |
| rs183315407 | 1  | 46201427  | IPP          | G | A | 0.0263723    | 0.0034926  | 4.3E-14    | 0.00453817   | 0.0035705  | 0.2         | 0.000293454 |
| rs2516726   | 16 | 2095065   | NTHL1        | T | C | 0.00990951   | 0.00164497 | 1.7E-09    | 0.00241747   | 0.00168016 | 0.15        | 0.000294332 |
| rs1458156   | 12 | 41887940  | PDZRN4       | C | T | -0.00928804  | 0.00137304 | 1.3E-11    | -0.00119199  | 0.00140199 | 0.4         | 0.000342333 |
| rs862320    | 16 | 69651866  | NFAT5        | C | T | 0.0143991    | 0.0013964  | 6.2E-25    | 0.00619317   | 0.00142627 | 0.000014    | 0.000364415 |
| rs10404726  | 19 | 18834514  | CRTC1        | C | T | 0.0122931    | 0.00137983 | 4.7E-19    | 0.00655626   | 0.00140712 | 0.0000032   | 0.000365358 |
| rs80236973  | 3  | 188001014 | LPP          | C | T | 0.0121589    | 0.00200803 | 1.4E-09    | 0.0000983    | 0.00205377 | 0.96        | 0.00037558  |
| rs12681792  | 8  | 62054463  | CLVS1        | C | A | -0.0095618   | 0.00174588 | 4.3E-08    | -0.000691572 | 0.00178344 | 0.7         | 0.00038693  |
| rs67679818  | 7  | 110672704 | IMMP2L       | C | T | 0.000406124  | 0.00139936 | 0.77       | 0.00779682   | 0.00142961 | 0.000000049 | 0.000388444 |
| rs10204994  | 2  | 35443726  | CRIM1        | G | A | 0.0101127    | 0.0016282  | 5.3E-10    | 0.000702062  | 0.00166492 | 0.67        | 0.000390225 |
| rs35918296  | 8  | 76862208  | HNF4G        | C | T | 0.0101759    | 0.00139402 | 2.9E-13    | 0.0166507    | 0.00142402 | 1.4E-31     | 0.000393968 |
| rs112380819 | 3  | 9498519   | SETD5        | G | A | -0.0136884   | 0.00225826 | 1.3E-09    | -0.00105451  | 0.00230938 | 0.65        | 0.000402594 |
| rs567230078 | 6  | 43588227  | GTPBP2       | T | A | 0.0250634    | 0.00424894 | 3.7E-09    | 0.00456547   | 0.00434176 | 0.29        | 0.000431868 |
| rs1631026   | 2  | 26953850  | KCNK3        | C | T | -0.0107027   | 0.00137118 | 5.9E-15    | -0.00268744  | 0.00140211 | 0.055       | 0.000475997 |
| rs61813324  | 1  | 156049877 | MEX3A        | C | T | -0.0182963   | 0.00202748 | 1.8E-19    | -0.00534173  | 0.00202727 | 0.01        | 0.000490051 |
| rs7084503   | 10 | 2666859   | PFKP         | T | C | 0.00486841   | 0.00137799 | 0.00041    | 0.012897     | 0.00140787 | 5.2E-20     | 0.000491534 |
| rs10174253  | 2  | 181323160 | CWC22        | A | C | -0.011209    | 0.00153204 | 2.5E-13    | -0.00308421  | 0.00156659 | 0.049       | 0.000495967 |
| rs1477290   | 5  | 87989334  | MEF2C        | T | C | -0.0199356   | 0.00200994 | 3.5E-23    | -0.00814691  | 0.00205406 | 0.000073    | 0.000499543 |
| rs36007635  | 6  | 163009335 | PARK2        | G | A | 0.0137121    | 0.00199026 | 5.6E-12    | 0.00264647   | 0.00203374 | 0.19        | 0.000503232 |
| rs10756555  | 9  | 14459089  | NFIB         | G | A | 0.0102259    | 0.00138891 | 1.6E-13    | 0.00113354   | 0.00141867 | 0.42        | 0.000521384 |
| rs945211    | 1  | 32191798  | BAI2         | G | C | -0.00849357  | 0.0014077  | 1.6E-09    | -0.00206335  | 0.0014391  | 0.15        | 0.000549797 |

|             |    |           |             |   |   |             |            |            |              |            |             |             |
|-------------|----|-----------|-------------|---|---|-------------|------------|------------|--------------|------------|-------------|-------------|
| rs1782917   | 15 | 52080803  | TMOD2       | T | C | 0.00873699  | 0.00138531 | 2.8E-10    | 0.00224617   | 0.00141427 | 0.11        | 0.002950311 |
| rs13107325  | 4  | 103188709 | SLC39A8     | C | T | -0.0287138  | 0.00260568 | 3.1E-28    | -0.021509    | 0.00266307 | 6.7E-16     | 0.002989822 |
| rs62621197  | 19 | 8670147   | ADAMTS10    | C | T | -0.00649794 | 0.00376905 | 0.085      | -0.0235313   | 0.0038478  | 9.6E-10     | 0.003050638 |
| rs6050446   | 20 | 25195509  | ENTPD6      | A | G | -0.0264171  | 0.00389465 | 1.2E-11    | -0.00669706  | 0.00397522 | 0.092       | 0.003073386 |
| rs7808296   | 7  | 103127620 | RELN        | C | T | -0.00254656 | 0.00147615 | 0.085      | -0.0100374   | 0.00150806 | 2.8E-11     | 0.003151586 |
| rs13241110  | 6  | 93913200  | EPHA7       | G | C | 0.00776998  | 0.00138403 | 0.00000002 | 0.00157096   | 0.00141426 | 0.27        | 0.003227397 |
| rs10095724  | 8  | 53739232  | RB1CC1      | G | A | 0.00295535  | 0.00143019 | 0.039      | 0.00937064   | 0.00146096 | 1.4E-10     | 0.003251315 |
| rs13174863  | 5  | 139080745 | CXXC5       | A | G | -0.0136233  | 0.00194393 | 2.4E-12    | -0.00402819  | 0.00198659 | 0.043       | 0.003469566 |
| rs7175642   | 15 | 59450079  | MYO1E       | T | G | 0.00859149  | 0.00147129 | 5.2E-09    | 0.00122353   | 0.00150205 | 0.42        | 0.003498348 |
| rs3181269   | 11 | 33755956  | CD59        | C | T | 0.00349142  | 0.00157276 | 0.026      | 0.00932683   | 0.00146066 | 6.4E-09     | 0.003637126 |
| rs2229330   | 1  | 6649228   | ZBTB48      | T | G | -0.00347061 | 0.00263546 | 0.19       | -0.0197417   | 0.00269425 | 2.3E-13     | 0.00375035  |
| rs2187642   | 12 | 11855624  | ETV6        | A | C | -0.00158448 | 0.00141476 | 0.26       | -0.0111759   | 0.00144458 | 1E-14       | 0.003789832 |
| rs3753639   | 1  | 154986091 | ZBTB7B      | T | C | -0.0114965  | 0.00160241 | 7.3E-13    | -0.00137638  | 0.00163815 | 0.4         | 0.003910227 |
| rs836179    | 12 | 50503082  | GPD1        | A | G | 0.00237187  | 0.00142112 | 0.095      | 0.00980524   | 0.00145108 | 1.4E-11     | 0.003938384 |
| rs6823268   | 4  | 145982563 | ANAPC10     | A | G | -0.0081752  | 0.00141821 | 8.2E-09    | -0.00235515  | 0.00144945 | 0.1         | 0.003992638 |
| rs34298980  | 6  | 40409243  | LRFN2       | T | C | 0.0132574   | 0.00144434 | 4.4E-20    | 0.00588487   | 0.00147589 | 0.000067    | 0.004016212 |
| rs11655704  | 17 | 47448172  | RP11-81K2.1 | T | C | 0.00244246  | 0.00147345 | 0.097      | 0.00827198   | 0.00150455 | 0.000000038 | 0.00410523  |
| rs1369159   | 15 | 66360842  | MEGF11      | C | T | -0.00787534 | 0.0013963  | 1.7E-08    | 0.00262301   | 0.00142549 | 0.065       | 0.004113603 |
| rs2253310   | 6  | 108888593 | FOXO3       | C | G | -0.0105591  | 0.00141638 | 9E-14      | -0.00513631  | 0.00144732 | 0.00039     | 0.004187978 |
| rs2275241   | 9  | 129370576 | LMX1B       | G | A | -0.00411426 | 0.00141867 | 0.0037     | -0.0103897   | 0.00144907 | 7.5E-13     | 0.004289318 |
| rs7331420   | 13 | 99236471  | STK24       | G | A | 0.00914179  | 0.00152583 | 2.1E-09    | -0.000762593 | 0.00155884 | 0.62        | 0.004294773 |
| rs67913249  | 5  | 43204126  | NIM1K       | C | G | 0.00934618  | 0.00145015 | 1.2E-10    | 0.00307131   | 0.00148198 | 0.038       | 0.004371666 |
| rs34196306  | 6  | 27425644  | ZNF184      | G | C | -0.00919436 | 0.00223807 | 0.00004    | -0.0199863   | 0.00228695 | 2.3E-18     | 0.004398136 |
| rs78517245  | 3  | 42587865  | SEC22C      | T | G | -0.0343879  | 0.00584937 | 4.1E-09    | -0.00697895  | 0.0059818  | 0.24        | 0.004419839 |
| rs12110721  | 6  | 55190480  | GFRAL       | C | A | -0.00788425 | 0.00185334 | 0.000021   | -0.0189364   | 0.00149983 | 1.5E-23     | 0.00444215  |
| rs4500770   | 16 | 74658430  | RFWD3       | A | T | 0.00782096  | 0.00142756 | 4.3E-08    | 0.000195701  | 0.0014581  | 0.89        | 0.004549716 |
| rs1177279   | 2  | 61295122  | KIAA1841    | A | G | 0.00206449  | 0.00152979 | 0.18       | 0.00883119   | 0.00156428 | 0.000000016 | 0.004786429 |
| rs12748436  | 1  | 177761109 | SEC16B      | C | G | -0.00565205 | 0.00258435 | 0.029      | -0.015605    | 0.002642   | 3.5E-09     | 0.004886058 |
| rs61754230  | 12 | 72179446  | RAB21       | C | T | -0.0273798  | 0.0049283  | 2.8E-08    | -0.00981169  | 0.0050322  | 0.051       | 0.005124163 |
| rs9834519   | 3  | 156379637 | TIPARP      | C | T | 0.015592    | 0.0025403  | 8.4E-10    | 0.00635684   | 0.00259802 | 0.014       | 0.005191597 |
| rs10823826  | 10 | 53649431  | PRKG1       | C | T | -0.00897916 | 0.00158888 | 1.6E-08    | -0.00255677  | 0.00162333 | 0.12        | 0.005241267 |
| rs11205303  | 1  | 149906413 | MTMR11      | T | C | 0.00123558  | 0.00139422 | 0.38       | 0.0095816    | 0.00142532 | 1.8E-11     | 0.005443306 |
| rs2035806   | 10 | 133984916 | JAKMIP3     | G | A | 0.00954916  | 0.00238642 | 5.7E-12    | 0.00256304   | 0.00141647 | 0.07        | 0.005464625 |
| rs4545941   | 19 | 16534207  | EPS15L1     | T | C | -0.00211814 | 0.00186443 | 0.26       | -0.0108751   | 0.00190325 | 0.000000011 | 0.0055171   |
| rs2343681   | 3  | 136535024 | SLC35G2     | G | A | -0.0123563  | 0.00167752 | 1.8E-13    | -0.00450582  | 0.00171549 | 0.0086      | 0.00551951  |
| rs12713889  | 2  | 77225361  | LRRTM4      | T | C | 0.00570459  | 0.00145418 | 0.000087   | 0.0116905    | 0.00148697 | 3.8E-15     | 0.005543345 |
| rs111584879 | 15 | 66678173  | TIPIN       | T | C | 0.00878936  | 0.00161059 | 4.8E-08    | 0.00133028   | 0.00164426 | 0.42        | 0.005645054 |
| rs75840515  | 1  | 80796649  | LPHN2       | A | G | -0.00900837 | 0.00152109 | 3.2E-09    | -0.00190383  | 0.00155502 | 0.22        | 0.005671362 |
| rs9462670   | 6  | 41014309  | OARD1       | G | C | -0.00941609 | 0.00162679 | 7.1E-09    | -0.000986425 | 0.00166233 | 0.55        | 0.005871044 |
| rs2051559   | 4  | 3298800   | RGS12       | T | C | -0.0138644  | 0.00202875 | 8.3E-12    | -0.0103118   | 0.00207344 | 0.000000066 | 0.005888223 |
| rs201475383 | 20 | 26273991  | FAM182B     | G | A | 0.0240169   | 0.00391789 | 8.8E-10    | 0.0069822    | 0.00399894 | 0.081       | 0.005939936 |
| rs12031634  | 1  | 34584393  | CSMD2       | T | A | 0.00880574  | 0.00150452 | 4.8E-09    | 0.0036029    | 0.00153808 | 0.019       | 0.006038232 |
| rs61985411  | 14 | 41336102  | LPHN1       | G | A | -0.0165324  | 0.00275855 | 2.1E-09    | -0.00147493  | 0.0022817  | 0.6         | 0.006041274 |
| rs61936936  | 12 | 116391685 | MED13L      | A | T | -0.00486384 | 0.00229556 | 0.034      | -0.0136211   | 0.00234396 | 6.2E-09     | 0.006078032 |
| rs215634    | 7  | 32369148  | PDE1C       | A | G | 0.0104342   | 0.00141137 | 1.4E-13    | 0.00343967   | 0.00144188 | 0.017       | 0.006335508 |
| rs6979832   | 7  | 127856276 | LFP         | A | G | -0.00330062 | 0.00137966 | 0.017      | -0.00941916  | 0.00140949 | 2.3E-11     | 0.006358941 |
| rs10935143  | 3  | 134665159 | EPHB1       | G | A | 0.00839848  | 0.00137905 | 1.1E-09    | 0.000763137  | 0.00141027 | 0.59        | 0.006363082 |
| rs2866720   | 7  | 70106310  | AUTS2       | C | T | -0.00912913 | 0.0014182  | 1.2E-10    | -0.0014556   | 0.00144886 | 0.32        | 0.006443831 |
| rs10505836  | 12 | 19288508  | PLEKHA5     | A | C | -0.0121361  | 0.00199185 | 1.1E-09    | -0.00307879  | 0.00203385 | 0.13        | 0.006551459 |
| rs17029006  | 3  | 12329452  | PPARG       | C | T | 0.0103969   | 0.0015534  | 2.2E-11    | 0.00441996   | 0.00158857 | 0.0054      | 0.006609749 |
| rs2970356   | 15 | 90623540  | ZNF710      | C | G | -0.00361773 | 0.00155211 | 0.02       | -0.0104594   | 0.00158456 | 4.1E-11     | 0.006643579 |
| rs11150462  | 16 | 82451679  | CDH13       | T | A | 0.00844366  | 0.0014248  | 3.1E-09    | 0.00309566   | 0.00145528 | 0.033       | 0.006853195 |
| rs60497719  | 19 | 33971746  | PEPD        | G | A | -0.00966895 | 0.00158251 | 1E-09      | -0.000429737 | 0.00161557 | 0.79        | 0.007059581 |
| rs13329943  | 16 | 24733751  | TNRC6A      | C | T | -0.0113063  | 0.00155186 | 3.2E-13    | -0.00546069  | 0.00158506 | 0.00057     | 0.007147804 |
| rs28839214  | 4  | 145313641 | GYP A       | G | T | -0.00891646 | 0.00140514 | 2.2E-10    | -0.00383324  | 0.00143609 | 0.0076      | 0.007474707 |
| rs12477385  | 2  | 166144850 | SCN2A       | G | T | 0.00924442  | 0.00164143 | 1.8E-08    | 0.00227952   | 0.00167844 | 0.17        | 0.007519801 |
| rs2755253   | 1  | 67470843  | SLC35D1     | C | T | 0.00153108  | 0.00150569 | 0.31       | 0.008712     | 0.00153927 | 0.000000015 | 0.007829571 |
| rs1778830   | 1  | 156489974 | LQGAP3      | G | A | -0.009908   | 0.00142688 | 3.8E-12    | -0.0037383   | 0.0014587  | 0.01        | 0.007969598 |
| rs7264802   | 20 | 62692440  | TCEA2       | A | G | -0.00980735 | 0.00159143 | 7.2E-10    | -0.00221817  | 0.00162435 | 0.17        | 0.007978942 |
| rs7539903   | 1  | 209208033 | CAMK1G      | T | A | 0.0076915   | 0.00140708 | 4.6E-08    | 0.001183     | 0.00143847 | 0.41        | 0.008176092 |
| rs61986330  | 14 | 73314450  | DPF3        | C | A | 0.00873325  | 0.00153905 | 1.4E-08    | 0.00362951   | 0.00157166 | 0.021       | 0.008204722 |
| rs329118    | 5  | 133861663 | JADE2       | C | T | 0.00948808  | 0.00139007 | 8.8E-12    | 0.00353033   | 0.00142058 | 0.013       | 0.008215378 |
| rs75957461  | 19 | 11166163  | SMARCA4     | C | T | -0.0176806  | 0.00304742 | 6.6E-09    | -0.00510904  | 0.00311109 | 0.1         | 0.008255818 |
| rs6669341   | 1  | 47678458  | TALI        | A | G | 0.0106846   | 0.0013873  | 1.3E-14    | 0.00627858   | 0.00141824 | 0.00000096  | 0.008406413 |
| rs12037905  | 1  | 219628036 | SLC30A10    | C | T | 0.00792729  | 0.00138814 | 1.1E-08    | 0.000748607  | 0.0014191  | 0.6         | 0.008422635 |
| rs3131336   | 6  | 28831611  | TRIM27      | C | T | -0.00818467 | 0.00213074 | 0.00012    | -0.019064    | 0.00217729 | 2E-18       | 0.008443093 |
| rs2939931   | 10 | 121636406 | MCMBP       | T | C | -0.00274182 | 0.00137365 | 0.046      | -0.00785688  | 0.00140343 | 0.000000022 | 0.008481064 |
| rs1865341   | 9  | 8845911   | PTPRD       | C | T | -0.00899606 | 0.00161509 | 2.5E-08    | -0.000627794 | 0.0016497  | 0.7         | 0.008516992 |
| rs76520838  | 15 | 47916618  | SEMA6D      | C | T | -0.0232182  | 0.00386698 | 1.9E-09    | -0.00412475  | 0.00394783 | 0.3         | 0.008536224 |
| rs2583410   | 4  | 102182199 | PPP3CA      | A | C | -0.0133529  | 0.00193619 | 5.3E-12    | -0.00522084  | 0.00197884 | 0.0083      | 0.008591386 |
| rs7989098   | 13 | 27925496  | GTF3A       | T | C | -0.00742477 | 0.0015923  | 0.0000031  | -0.0120926   | 0.00162629 | 1E-13       | 0.008852163 |
| rs6511826   | 19 | 12706991  | ZNF490      | G | A | 0.013982    | 0.00245639 | 1.3E-08    | 0.00551122   | 0.00250771 | 0.028       | 0.008887634 |
| rs3452489   | 17 | 51917844  | KIF2B       | A | C | 0.00777978  | 0.00140115 | 2.8E-08    | 0.00252149   | 0.00143071 | 0.078       | 0.008989157 |
| rs869400    | 3  | 185826740 | DGKG        | T | G | -0.0183105  | 0.00176638 | 3.5E-25    | -0.00922265  | 0.00180637 | 0.000000033 | 0.009048169 |
| rs1477890   | 4  | 18511738  | LCORL       | A | C | -0.00977959 | 0.00137366 | 1.1E-12    | -0.0042684   | 0.00140391 | 0.0024      | 0.009381794 |
| rs6963840   | 7  | 78144371  | MAGI2       | C | T | -0.0129345  | 0.00189361 | 8.5E-12    | -0.00684037  | 0.00193454 | 0.00041     | 0.009431928 |
| rs2660241   | 16 | 4940023   | PPL         | T | C | -0.00812512 | 0.00142623 | 1.2E-08    | -0.00240525  | 0.00145674 | 0.099       | 0.009447561 |
| rs818898    | 9  | 6970806   | KDM4C       | A | G | 0.00619175  | 0.00149048 | 0.000033   | 0.0120672    | 0.00152242 | 2.3E-15     | 0.009558092 |
| rs12644329  | 4  | 143634746 | INPP4B      | G | A | 0.00791227  | 0.00141949 | 2.5E-08    | 0.00177866   | 0.00145075 | 0.22        | 0.009713174 |
| rs4989244   | 9  | 102100348 | SEC61B      | G | A | 0.00763477  | 0.00138564 | 3.6E-08    | 0.00260557   | 0.00141533 | 0.066       | 0.009727535 |

|             |    |           |               |   |   |              |            |            |              |            |             |             |
|-------------|----|-----------|---------------|---|---|--------------|------------|------------|--------------|------------|-------------|-------------|
| rs35809007  | 2  | 47019521  | LINC01118     | G | A | 0.0105922    | 0.00142731 | 1.2E-13    | 0.00433584   | 0.0014595  | 0.003       | 0.010094931 |
| rs115866895 | 1  | 1592638   | SLC35E2B      | A | G | 0.0120194    | 0.0015664  | 1.7E-14    | 0.00560296   | 0.00160134 | 0.00047     | 0.010293043 |
| rs73085586  | 20 | 22430241  | FOXA2         | G | A | -0.00465313  | 0.00171669 | 0.0067     | -0.00970779  | 0.0017522  | 0.000000003 | 0.010334787 |
| rs7503580   | 17 | 79087036  | BAIAP2        | C | T | -0.00487897  | 0.00189311 | 0.01       | -0.0111158   | 0.00193305 | 8.9E-09     | 0.010385599 |
| rs4911382   | 20 | 32553095  | RALY          | C | T | -0.00831839  | 0.00139678 | 2.6E-09    | -0.0022266   | 0.00142568 | 0.12        | 0.010644474 |
| rs7840305   | 8  | 57168101  | CHCHD7        | A | G | 0.00341742   | 0.00141931 | 0.016      | 0.008059     | 0.00144985 | 0.000000027 | 0.010975357 |
| rs16996644  | 20 | 15813475  | MACROD2       | C | G | -0.0106002   | 0.00206764 | 0.0000029  | -0.0193482   | 0.00211042 | 4.8E-20     | 0.011014364 |
| rs12992672  | 2  | 632592    | TMEM18        | G | A | -0.0359503   | 0.00181142 | 1.2E-87    | -0.0433484   | 0.00185227 | 4E-121      | 0.01113063  |
| rs3815156   | 17 | 29685150  | NFI           | A | G | -0.00529424  | 0.00180617 | 0.0034     | -0.010306    | 0.00184428 | 0.000000023 | 0.011565044 |
| rs4759073   | 12 | 54653258  | CBX5          | G | A | 0.00934791   | 0.00139222 | 1.9E-11    | 0.000435375  | 0.00142157 | 0.76        | 0.011653261 |
| rs9438393   | 1  | 205782718 | SLC41A1       | A | G | 0.00526644   | 0.00139059 | 0.00015    | 0.0103485    | 0.0014216  | 3.4E-13     | 0.01170179  |
| rs72753485  | 9  | 96673230  | BARX1         | G | C | -0.0155961   | 0.00249848 | 4.3E-10    | -0.0036761   | 0.00255202 | 0.15        | 0.011931028 |
| rs1547205   | 9  | 98815145  | ERCC6L2       | G | C | 0.0132049    | 0.00232169 | 1.3E-08    | 0.00201872   | 0.00237144 | 0.39        | 0.012072566 |
| rs4648450   | 1  | 2723214   | TTC34         | C | A | 0.0098008    | 0.00137971 | 1.2E-12    | 0.00435452   | 0.00141048 | 0.002       | 0.012291742 |
| rs724623    | 14 | 47303577  | MDGA2         | A | C | 0.0102441    | 0.00137406 | 9E-14      | 0.00437332   | 0.00140317 | 0.0018      | 0.012362303 |
| rs35162296  | 6  | 26318262  | HIST1H4H      | C | T | -0.0114195   | 0.0022233  | 0.00000028 | -0.0200619   | 0.00227186 | 1E-18       | 0.01237244  |
| rs1899689   | 7  | 121964349 | CADP52        | C | T | -0.00773624  | 0.00140509 | 3.7E-08    | -0.00309859  | 0.00143546 | 0.031       | 0.012386562 |
| rs78886584  | 1  | 16859325  | FAM231B       | A | G | -0.0084915   | 0.0013848  | 8.7E-10    | -0.00152215  | 0.00141569 | 0.28        | 0.012391498 |
| rs9594686   | 13 | 42723197  | DGKH          | C | T | 0.00604231   | 0.00180431 | 0.00081    | 0.0107007    | 0.00184282 | 6.4E-09     | 0.012783336 |
| rs1598121   | 3  | 82694710  | GBE1          | A | G | -0.00896415  | 0.00142305 | 3E-10      | -0.0032264   | 0.00145527 | 0.027       | 0.012895303 |
| rs9888533   | 13 | 107854612 | FAM155A       | C | T | -0.00765412  | 0.00139943 | 4.5E-08    | -0.0011471   | 0.0014293  | 0.42        | 0.013187276 |
| rs2576135   | 13 | 54691442  | OLFM4         | T | A | 0.0131674    | 0.00238721 | 3.5E-08    | 0.00120958   | 0.00243817 | 0.62        | 0.013214562 |
| rs7311698   | 1  | 25015638  | SRRM1         | C | T | 0.00821032   | 0.00148524 | 3.2E-08    | 0.00314307   | 0.00151837 | 0.038       | 0.013338296 |
| rs28711392  | 11 | 13349559  | ARNLT         | T | C | 0.0117792    | 0.00143412 | 2.1E-16    | 0.00576055   | 0.00146498 | 0.000084    | 0.013467265 |
| rs7549358   | 1  | 115252609 | NRAS          | G | C | 0.00882987   | 0.00142922 | 6.5E-10    | 0.00361946   | 0.00146111 | 0.013       | 0.013572218 |
| rs1905616   | 8  | 93235675  | RUNX1T1       | G | A | 0.00819683   | 0.00145677 | 1.8E-08    | 0.000802342  | 0.00148811 | 0.59        | 0.01402263  |
| rs6752979   | 2  | 81741750  | CTNNA2        | G | A | -0.00895678  | 0.00146997 | 1.1E-09    | -0.00367287  | 0.00150312 | 0.015       | 0.014032948 |
| rs6449532   | 5  | 60715446  | ZSWIM6        | C | T | 0.00697674   | 0.00142588 | 0.00000099 | 0.0110534    | 0.00145717 | 3.3E-14     | 0.014363953 |
| rs7020196   | 9  | 12289527  | TYRP1         | C | T | 0.00778854   | 0.00141323 | 3.6E-08    | 0.000551538  | 0.00144352 | 0.7         | 0.014377489 |
| rs368540015 | 7  | 74292165  | GTF2IRD2      | A | G | -0.0181657   | 0.00324824 | 2.2E-08    | -0.00572743  | 0.00331846 | 0.084       | 0.014377606 |
| rs6761463   | 2  | 50201547  | NRXN1         | G | C | 0.0125814    | 0.00185776 | 1.3E-11    | 0.00361307   | 0.00189965 | 0.057       | 0.01455048  |
| rs35390852  | 4  | 143067054 | INPP4B        | G | A | -0.0113857   | 0.00208652 | 4.8E-08    | -0.0013317   | 0.00213247 | 0.53        | 0.014631605 |
| rs6583310   | 3  | 196170985 | UBXN7         | G | C | -0.00878295  | 0.0013839  | 2.2E-10    | -0.00326447  | 0.00141523 | 0.021       | 0.014689735 |
| rs1987960   | 20 | 30649834  | HCK           | T | C | -0.0189251   | 0.00331178 | 1.1E-08    | -0.00562982  | 0.0033803  | 0.096       | 0.014744999 |
| rs115778101 | 1  | 78198554  | USP33         | T | C | 0.0177683    | 0.00321873 | 3.4E-08    | 0.00692255   | 0.00329052 | 0.035       | 0.015091607 |
| rs10116891  | 9  | 122651993 | RP11-295D22.1 | G | A | -0.00993581  | 0.00228645 | 0.000014   | -0.0133983   | 0.00233545 | 5.8E-09     | 0.015718569 |
| rs12450028  | 17 | 2207425   | SRR           | C | T | 0.00685806   | 0.00144277 | 0.000002   | 0.0115636    | 0.00147321 | 4.2E-15     | 0.015785559 |
| rs537508    | 4  | 171042158 | AADAT         | G | C | -0.00777315  | 0.00139636 | 2.6E-08    | -0.00326427  | 0.00142711 | 0.022       | 0.015967644 |
| rs7020564   | 9  | 109670016 | ZNF462        | A | T | 0.00497384   | 0.00152062 | 0.0011     | 0.0100197    | 0.0015532  | 1.1E-10     | 0.015986261 |
| rs10953577  | 7  | 108263540 | DNAJB9        | T | C | -0.00247917  | 0.00141639 | 0.08       | -0.00858308  | 0.00144701 | 0.000000003 | 0.016156161 |
| rs34994596  | 15 | 80991447  | ABHD17C       | T | C | 0.0111514    | 0.00150201 | 1.1E-13    | 0.00477498   | 0.00153342 | 0.0018      | 0.01650886  |
| rs34373881  | 3  | 20432033  | SGOL1         | G | A | 0.00883268   | 0.00153671 | 9E-09      | 0.00198039   | 0.00157151 | 0.21        | 0.016652236 |
| rs45521740  | 19 | 2245622   | SF3A2         | G | A | -0.0180325   | 0.00295173 | 1E-09      | -0.00869428  | 0.0030134  | 0.0039      | 0.017984149 |
| rs200801362 | 6  | 31555480  | LST1          | T | C | -0.00607736  | 0.00253968 | 0.017      | -0.0188461   | 0.00259515 | 3.8E-13     | 0.01802019  |
| rs2629881   | 3  | 59778271  | FHIT          | C | T | -0.002263976 | 0.00164596 | 0.11       | -0.0105954   | 0.00169243 | 3.8E-10     | 0.018056076 |
| rs4663213   | 2  | 236807893 | AGAP1         | G | A | 0.0094607    | 0.00165947 | 1.2E-08    | 0.00103579   | 0.00169689 | 0.54        | 0.018364109 |
| rs112852122 | 20 | 47498117  | ARFGF2        | G | A | 0.0133703    | 0.00191182 | 2.7E-12    | 0.00375107   | 0.00195137 | 0.055       | 0.018619791 |
| rs9615723   | 22 | 48386670  | FAM19A5       | C | T | 0.00771492   | 0.00140281 | 3.8E-08    | 0.00226115   | 0.0014315  | 0.11        | 0.018870846 |
| rs9370527   | 6  | 56245812  | COL21A1       | G | A | -0.00327636  | 0.00160074 | 0.041      | -0.00949473  | 0.00163571 | 6.4E-09     | 0.018960632 |
| rs11513729  | 12 | 112273499 | MAPKAPK5      | C | T | 0.00799293   | 0.00141154 | 1.5E-08    | 0.00106932   | 0.00144129 | 0.46        | 0.019564768 |
| rs1476698   | 2  | 242296449 | FARP2         | A | G | 0.00138506   | 0.00141763 | 0.33       | 0.00822246   | 0.0014496  | 0.000000014 | 0.022013211 |
| rs7239114   | 18 | 45921214  | ZBTB7C        | G | A | -0.00644481  | 0.00138816 | 0.0000034  | -0.0134996   | 0.00147129 | 1.7E-21     | 0.022399676 |
| rs533493779 | 2  | 104447054 | TMEM182       | A | T | -0.00869294  | 0.00142487 | 1.1E-09    | -0.000575884 | 0.001457   | 0.69        | 0.022930495 |
| rs11765062  | 7  | 54417515  | VSTM2A        | T | C | 0.00751629   | 0.00137499 | 4.6E-08    | 0.000936617  | 0.00140472 | 0.5         | 0.022963313 |
| rs1409158   | 1  | 119538890 | TBX15         | C | T | 0.00923072   | 0.00161087 | 0.0000001  | 0.00333182   | 0.0016468  | 0.043       | 0.023361182 |
| rs1333010   | 13 | 66205228  | PCDH9         | G | A | 0.00653104   | 0.00140819 | 0.0000035  | 0.0120684    | 0.00143825 | 4.8E-17     | 0.023440556 |
| rs12885251  | 14 | 99670791  | BCL11B        | G | A | 0.00762803   | 0.00139078 | 4.1E-08    | 0.00213171   | 0.00142025 | 0.13        | 0.023751521 |
| rs77976727  | 8  | 4300554   | CSMD1         | C | T | -0.00743742  | 0.00253836 | 0.0016     | -0.0151036   | 0.0024091  | 3.6E-10     | 0.023776099 |
| rs8015400   | 14 | 25930988  | STXBP6        | C | A | -0.0126459   | 0.00146766 | 6.9E-18    | -0.00733747  | 0.00149876 | 0.00000098  | 0.024195466 |
| rs10842356  | 12 | 24621348  | BCAT1         | A | T | 0.00518695   | 0.00137144 | 0.00016    | 0.00823376   | 0.00140036 | 4.1E-09     | 0.024505514 |
| rs142503704 | 5  | 92622421  | NR2F1         | G | A | -0.0262684   | 0.00467519 | 1.9E-08    | -0.00812529  | 0.0047778  | 0.089       | 0.024660599 |
| rs4723263   | 7  | 33194826  | BBS9          | G | C | -0.00253823  | 0.00138286 | 0.066      | -0.00832963  | 0.00141275 | 3.7E-09     | 0.024836345 |
| rs73422097  | 6  | 41727740  | PGC           | A | G | -0.00587366  | 0.00149213 | 0.00083    | -0.0106191   | 0.00152472 | 3.3E-12     | 0.025444845 |
| rs13061117  | 3  | 181186466 | SOX2          | T | C | -0.0146976   | 0.00242091 | 1.3E-09    | -0.0079932   | 0.00247572 | 0.0012      | 0.025993132 |
| rs61937656  | 12 | 39483502  | CPNE8         | G | A | 0.00506716   | 0.00164351 | 0.002      | 0.0117234    | 0.00167816 | 2.8E-12     | 0.026196865 |
| rs4575195   | 10 | 114765747 | TCF7L2        | C | A | 0.00959417   | 0.00147977 | 9E-11      | 0.00442711   | 0.00151186 | 0.0034      | 0.026338786 |
| rs1040046   | 6  | 83473573  | UBE3D         | C | A | -0.0112601   | 0.00192094 | 4.6E-09    | -0.00124798  | 0.0019629  | 0.52        | 0.026392676 |
| rs788163    | 2  | 172931559 | METAP1D       | A | C | -0.0100556   | 0.00153629 | 5.9E-11    | -0.00356573  | 0.00157094 | 0.023       | 0.026746769 |
| rs686431    | 6  | 35974217  | SLC26A8       | C | T | -0.0147642   | 0.00508885 | 0.0037     | -0.030172    | 0.0052     | 6.5E-09     | 0.026774516 |
| rs2246623   | 17 | 74084449  | EXOC7         | C | T | 0.00479438   | 0.00138107 | 0.00052    | 0.00894181   | 0.00141021 | 2.3E-10     | 0.026965243 |
| rs78907487  | 22 | 22151939  | MAPK1         | A | C | -0.00677401  | 0.00193715 | 0.00047    | -0.0123725   | 0.00197676 | 3.9E-10     | 0.02702925  |
| rs7103389   | 11 | 881639    | CHID1         | T | C | -0.00946008  | 0.00142256 | 2.9E-11    | -0.00453219  | 0.00145317 | 0.0018      | 0.027167704 |
| rs12927792  | 16 | 9713194   | RP11-297M9.1  | C | T | -0.00867045  | 0.00139549 | 5.2E-10    | -0.00196508  | 0.00142535 | 0.17        | 0.027318788 |
| rs2083323   | 18 | 1856272   | METTL4        | G | A | -0.0104121   | 0.00179988 | 7.3E-09    | -0.0050254   | 0.00183766 | 0.0062      | 0.027430303 |
| rs13218383  | 6  | 120173501 | MAN1A1        | C | G | 0.00931833   | 0.00145169 | 1.4E-10    | 0.00422494   | 0.0014834  | 0.0044      | 0.027796792 |
| rs9673839   | 16 | 76895693  | RP11-58C22.1  | A | G | -0.00830314  | 0.00137898 | 1.7E-09    | -0.00319534  | 0.00140847 | 0.023       | 0.027873741 |
| rs2186118   | 1  | 66456465  | PDE4B         | C | A | 0.00986064   | 0.00151196 | 6.9E-11    | 0.00489994   | 0.00154569 | 0.0015      | 0.027920812 |
| rs4074404   | 1  | 187683956 | PLA2G4A       | T | A | -0.00483623  | 0.00188095 | 0.01       | -0.0126757   | 0.0019229  | 4.3E-11     | 0.027954707 |
| rs35193668  | 13 | 33092929  | N4BP2L2       | C | T | 0.0104702    | 0.00143054 | 2.5E-13    | 0.00567781   | 0.00146108 | 0.0001      | 0.028250277 |
| rs698147    | 5  | 3513485   | IRX1          | A | G | 0.00877987   | 0.0013771  | 1.8E-10    | 0.00140861   | 0.00140733 | 0.32        | 0.028600076 |

|             |    |           |              |   |   |             |             |            |             |            |             |             |
|-------------|----|-----------|--------------|---|---|-------------|-------------|------------|-------------|------------|-------------|-------------|
| rs3806114   | 6  | 20482335  | E2F3         | G | A | 0.00878865  | 0.00147166  | 2.3E-09    | 0.00151126  | 0.00150381 | 0.31        | 0.028752625 |
| rs1704190   | 2  | 200760629 | C2orf69      | G | A | -0.00833069 | 0.00142051  | 4.5E-09    | -0.00123448 | 0.00145254 | 0.4         | 0.028828951 |
| rs10860295  | 12 | 98542699  | RP11-181C3.1 | T | C | -0.00180776 | 0.0013812   | 0.19       | -0.00851585 | 0.00141032 | 1.6E-09     | 0.029287587 |
| rs139497    | 22 | 41640098  | RANGAP1      | C | T | 0.00619711  | 0.00149173  | 0.000033   | 0.0102085   | 0.00152224 | 2E-11       | 0.029573269 |
| rs868784    | 11 | 43944388  | C1orf96      | G | A | 0.00787224  | 0.00141664  | 2.7E-08    | 0.00227508  | 0.00144712 | 0.12        | 0.030020767 |
| rs6597653   | 9  | 133788465 | FIBCD1       | G | C | -0.0085299  | 0.00140699  | 1.3E-09    | -0.00305337 | 0.00143714 | 0.034       | 0.030302637 |
| rs11215403  | 11 | 115058585 | CADM1        | G | A | 0.00590973  | 0.00159996  | 0.00022    | 0.0132366   | 0.00163438 | 5.5E-16     | 0.030437904 |
| rs146980124 | 17 | 44627649  | ARL17A       | A | C | 0.00548036  | 0.0016892   | 0.0012     | 0.0102411   | 0.00172485 | 2.9E-09     | 0.031060136 |
| rs1799507   | 12 | 16427314  | SLC15A5      | G | A | -0.0108354  | 0.00195679  | 3.1E-08    | -0.00295156 | 0.00199804 | 0.14        | 0.03107603  |
| rs7141912   | 14 | 35649431  | KIAA0391     | A | T | 0.0118214   | 0.00206846  | 1.1E-08    | 0.00613534  | 0.00211229 | 0.0037      | 0.031222715 |
| rs212517    | 1  | 21577159  | ECE1         | T | A | 0.00156219  | 0.00139997  | 0.26       | 0.00875288  | 0.0014312  | 9.6E-10     | 0.031940958 |
| rs12213441  | 6  | 143208838 | HIVEP2       | C | T | -0.0105064  | 0.00167201  | 3.3E-10    | -0.00385056 | 0.00170854 | 0.024       | 0.032227459 |
| rs9603697   | 13 | 40783323  | AL133318.1   | C | T | -0.0085306  | 0.00146459  | 5.7E-09    | -0.0129577  | 0.00149585 | 4.6E-18     | 0.032732558 |
| rs36131051  | 3  | 107888841 | IFT57        | T | G | 0.0107943   | 0.00171155  | 2.9E-10    | 0.000827802 | 0.0017503  | 0.64        | 0.034145107 |
| rs10896348  | 11 | 68357368  | PPP6R3       | T | C | 0.00720097  | 0.00153112  | 0.0000026  | 0.0118678   | 0.00156406 | 3.3E-14     | 0.034563572 |
| rs9852062   | 3  | 45373442  | LARS2        | T | A | 0.00817197  | 0.00138361  | 3.5E-09    | 0.00289301  | 0.00141493 | 0.041       | 0.034610962 |
| rs7162542   | 15 | 84514290  | ADAMTSL3     | C | G | 0.00314669  | 0.00138179  | 0.023      | 0.00931445  | 0.00141068 | 4E-11       | 0.035517028 |
| rs1286138   | 14 | 91485445  | RPS6KA5      | T | G | -0.00900388 | 0.00146728  | 8.4E-10    | -0.00544322 | 0.00149837 | 0.00028     | 0.035559634 |
| rs7759938   | 6  | 105378954 | LIN28B       | C | T | -0.00304747 | 0.00146741  | 0.038      | -0.00997693 | 0.00149947 | 2.9E-11     | 0.035723566 |
| rs78565420  | 8  | 85703065  | RALYL        | C | T | -0.018757   | 0.0015301   | 2.7E-09    | -0.0106744  | 0.00322084 | 0.00092     | 0.036245462 |
| rs79675564  | 2  | 211286896 | LANCL1       | C | A | -0.0150946  | 0.00255465  | 3.4E-09    | -0.00366598 | 0.00261226 | 0.16        | 0.0364714   |
| rs16940823  | 18 | 21237319  | HRH4         | C | A | 0.010772    | 0.00178542  | 1.6E-09    | 0.00341791  | 0.00182289 | 0.061       | 0.037385628 |
| rs12951079  | 17 | 34933059  | GGNB2        | G | A | 0.0107877   | 0.00140507  | 1.6E-14    | 0.0074237   | 0.00143471 | 0.00000023  | 0.037429776 |
| rs7038966   | 9  | 73777777  | TRPM3        | C | T | -0.00947635 | 0.00140121  | 1.4E-11    | -0.00365092 | 0.00143123 | 0.0011      | 0.037584731 |
| rs10760277  | 9  | 126093999 | CRB2         | C | T | -0.00886536 | 0.00141365  | 3.6E-10    | -0.00168407 | 0.00144394 | 0.24        | 0.038042894 |
| rs11040333  | 11 | 49346332  | FOLH1        | G | A | -0.00397729 | 0.00151208  | 0.0085     | -0.00854938 | 0.00154462 | 0.000000031 | 0.038633661 |
| rs10823504  | 10 | 72034062  | NPFPR1       | G | A | 0.000901726 | 0.00281193  | 0.75       | 0.0158621   | 0.0028729  | 0.000000034 | 0.039871951 |
| rs7518221   | 1  | 225561346 | DNAH14       | T | C | 0.00795352  | 0.00143293  | 2.8E-08    | 0.0018025   | 0.0014649  | 0.22        | 0.040921179 |
| rs7931626   | 11 | 28421841  | METTL15      | C | T | 0.00527104  | 0.00137584  | 0.00013    | 0.00970346  | 0.00140544 | 5E-12       | 0.043379127 |
| rs66674732  | 13 | 62721160  | PCDH20       | G | A | -0.00816409 | 0.00141088  | 7.2E-09    | -0.00267594 | 0.00144099 | 0.063       | 0.043621463 |
| rs9579775   | 13 | 20616557  | ZMYM2        | A | C | -0.0146498  | 0.00208415  | 2.1E-12    | -0.00467691 | 0.00212864 | 0.028       | 0.044631338 |
| rs544957562 | 9  | 33978015  | UBAP2        | A | T | 0.0123934   | 0.00202306  | 9E-10      | 0.00573856  | 0.00206642 | 0.0055      | 0.045950774 |
| rs4432271   | 16 | 20245283  | GP2          | C | T | -0.0115565  | 0.00206349  | 2.1E-08    | -0.0175304  | 0.00210763 | 9E-17       | 0.046056039 |
| rs80082351  | 3  | 114415926 | ZBTB20       | A | G | 0.018501    | 0.00284688  | 8.1E-11    | 0.00748991  | 0.00291133 | 0.01        | 0.046539114 |
| rs16839832  | 1  | 196349909 | KCNT2        | G | T | -0.00265015 | 0.00249835  | 0.29       | -0.0148088  | 0.00255407 | 0.000000035 | 0.04740739  |
| rs76824303  | 3  | 62459819  | CADPS        | A | C | 0.0151797   | 0.00234294  | 9.2E-11    | 0.00618417  | 0.00239599 | 0.0098      | 0.047534914 |
| rs544200874 | 4  | 20124826  | SLIT2        | C | T | -0.0176783  | 0.0027129   | 7.2E-11    | -0.00865278 | 0.00277265 | 0.0018      | 0.047578885 |
| rs113132247 | 9  | 131026108 | GOLGA2       | G | A | -0.0123286  | 0.0019113   | 1.1E-10    | -0.00549973 | 0.00195226 | 0.0048      | 0.047733299 |
| rs62379271  | 5  | 105870033 | EFNAs5       | T | G | -0.0078061  | 0.00139152  | 0.00000002 | -0.00321644 | 0.00142206 | 0.024       | 0.048401106 |
| rs11047138  | 12 | 24019853  | SOX5         | C | G | -0.0143769  | 0.00262949  | 4.6E-08    | -0.00508395 | 0.00268493 | 0.058       | 0.048972068 |
| rs7086898   | 10 | 104386152 | SUFU         | A | G | -0.0138742  | 0.00253258  | 4.3E-08    | -0.00497773 | 0.00258749 | 0.054       | 0.049460543 |
| rs57488047  | 15 | 79403002  | RASGRF1      | T | C | 0.00986083  | 0.00138545  | 1.1E-12    | 0.00377491  | 0.00141442 | 0.0076      | 0.049804678 |
| rs11856579  | 15 | 78012688  | LINGO1       | G | A | 0.00917954  | 0.00155262  | 3.4E-09    | 0.00487577  | 0.00158509 | 0.0021      | 0.050405273 |
| rs12147845  | 14 | 101144596 | DLK1         | C | T | -0.0135688  | 0.00214705  | 2.6E-10    | -0.00775094 | 0.00219254 | 0.00041     | 0.050832014 |
| rs7606059   | 2  | 188152749 | CALCRL       | T | C | -0.00404686 | 0.00146282  | 0.0057     | -0.0105079  | 0.0014958  | 2.1E-12     | 0.051915241 |
| rs8124896   | 20 | 21385659  | NKX2-4       | T | C | -0.0131677  | 0.00228357  | 8.1E-09    | -0.00577363 | 0.00233081 | 0.013       | 0.052813998 |
| rs4677813   | 3  | 194863860 | XXYLT1       | T | C | 0.00893255  | 0.00158099  | 1.6E-08    | 0.00559913  | 0.00161678 | 0.00053     | 0.053062705 |
| rs884152    | 8  | 25770557  | EBF2         | G | T | -0.00332391 | 0.0014324   | 0.02       | -0.00851231 | 0.00146322 | 0.000000006 | 0.054623685 |
| rs34811474  | 4  | 25408838  | ANAPC4       | G | A | 0.0165964   | 0.00162688  | 2E-24      | 0.0102115   | 0.00166271 | 8.2E-10     | 0.054632877 |
| rs76702514  | 1  | 195148296 | KCNT2        | C | G | 0.0101367   | 0.001689    | 2E-09      | 0.00391119  | 0.00172668 | 0.024       | 0.055399445 |
| rs12821683  | 12 | 58588964  | XRC6BP1      | T | C | -0.0111753  | 0.00201297  | 2.8E-08    | -0.00532484 | 0.00205541 | 0.0096      | 0.056015602 |
| rs73078357  | 3  | 48695834  | CELSR3       | G | C | 0.0118946   | 0.001029239 | 1.3E-08    | 0.00489077  | 0.00213976 | 0.022       | 0.056895598 |
| rs7869098   | 9  | 27816218  | LINGO2       | T | G | 0.00636075  | 0.00137674  | 0.0000038  | 0.00984298  | 0.00140624 | 2.6E-12     | 0.057057987 |
| rs12462975  | 19 | 30272202  | CCNE1        | G | A | -0.0114755  | 0.00146997  | 5.9E-15    | -0.00515105 | 0.00150068 | 0.0006      | 0.057365504 |
| rs114728753 | 3  | 78483402  | ROBO1        | A | A | -0.00895145 | 0.00146561  | 1E-09      | -0.00131501 | 0.00149879 | 0.38        | 0.057601386 |
| rs7565437   | 2  | 65646966  | SPRED2       | T | C | 0.00200679  | 0.0013944   | 0.15       | 0.00818295  | 0.00142584 | 9.5E-09     | 0.057731627 |
| rs9788550   | 14 | 29681138  | PRKD1        | G | C | 0.0137871   | 0.00159576  | 5.6E-18    | 0.00768056  | 0.00162958 | 0.0000024   | 0.058146177 |
| rs680071    | 11 | 103088414 | DYNC2H1      | T | C | -0.0117393  | 0.0021142   | 2.8E-08    | -0.00613943 | 0.00215969 | 0.0045      | 0.058993867 |
| rs1222216   | 11 | 30346052  | ARL14EP      | C | T | 0.0121516   | 0.00163666  | 1.1E-13    | 0.00508542  | 0.00167187 | 0.0024      | 0.059274907 |
| rs12634936  | 3  | 147716498 | ZIC1         | C | T | -0.0181042  | 0.00314699  | 8.8E-09    | -0.0110744  | 0.00321824 | 0.00058     | 0.059983727 |
| rs4677156   | 3  | 72417857  | RYBP         | A | T | 0.00378299  | 0.00164241  | 0.021      | 0.00924646  | 0.00167959 | 0.000000037 | 0.060335066 |
| rs329651    | 11 | 133767622 | IGSF9B       | G | T | -0.0110894  | 0.00173557  | 1.7E-10    | -0.00717249 | 0.00177292 | 0.000052    | 0.060456641 |
| rs4783789   | 16 | 51446707  | SALL1        | T | C | 0.00165356  | 0.00164771  | 0.32       | 0.0095829   | 0.00168296 | 0.000000012 | 0.061573683 |
| rs12363672  | 11 | 55684028  | ORSW2        | A | C | -0.0238392  | 0.00429171  | 2.8E-08    | -0.0132424  | 0.00438406 | 0.0025      | 0.061752495 |
| rs10457469  | 6  | 126083658 | HEY2         | G | A | -0.00763453 | 0.00137206  | 2.6E-08    | -0.00308041 | 0.00140203 | 0.028       | 0.062338597 |
| rs2034963   | 3  | 48170802  | CDC25A       | G | C | 0.00500354  | 0.00144686  | 0.00054    | 0.0110872   | 0.00147962 | 6.7E-14     | 0.062610953 |
| rs7719067   | 5  | 153538241 | MFAP3        | A | G | 0.0093096   | 0.00138359  | 1.7E-11    | 0.0134519   | 0.00141395 | 1.8E-21     | 0.062907105 |
| rs117455294 | 20 | 57427951  | GNAS         | C | A | 0.00489944  | 0.0031084   | 0.11       | 0.0193211   | 0.00317271 | 1.1E-09     | 0.063425445 |
| rs2207894   | 20 | 54387343  | CBLN4        | C | T | 0.00760055  | 0.0017451   | 0.000013   | 0.0143543   | 0.0017812  | 7.7E-16     | 0.064001799 |
| rs126910503 | 2  | 25446473  | DNMT3A       | G | A | 0.0147822   | 0.00491444  | 0.0026     | 0.0334164   | 0.00502526 | 2.9E-11     | 0.065188252 |
| rs1805123   | 7  | 150645534 | KCNH2        | T | G | 0.0110468   | 0.00159322  | 4.1E-12    | 0.00583885  | 0.00162766 | 0.00033     | 0.067501198 |
| rs10791113  | 11 | 130873165 | SNX19        | A | G | -0.00856944 | 0.00137526  | 4.6E-10    | -0.00396314 | 0.00140485 | 0.0048      | 0.069501882 |
| rs796915    | 6  | 154304628 | OPRM1        | C | G | -0.00736863 | 0.00149082  | 0.0000077  | -0.0129135  | 0.00152339 | 2.3E-17     | 0.069754936 |
| rs7275233   | 15 | 100692953 | ADAMTS17     | G | A | -0.0096828  | 0.00217908  | 0.0000088  | -0.0176324  | 0.00222464 | 2.3E-15     | 0.069801394 |
| rs10416697  | 14 | 79945162  | NRXN3        | A | G | -0.0159997  | 0.00165074  | 3.2E-22    | -0.00868742 | 0.00168572 | 0.000000026 | 0.071590119 |
| rs3823674   | 7  | 50571996  | DDC          | C | T | 0.00765672  | 0.00138882  | 3.5E-08    | 0.00484169  | 0.00141884 | 0.00064     | 0.073239869 |
| rs72652703  | 8  | 67209548  | CRH          | T | C | 0.00992488  | 0.001578    | 3.2E-10    | 0.00486743  | 0.00161195 | 0.0025      | 0.07333846  |
| rs35221880  | 12 | 133301500 | ANKLE2       | T | C | 0.00857287  | 0.00155424  | 3.5E-08    | 0.00472496  | 0.00158701 | 0.0029      | 0.073791833 |
| rs1775255   | 6  | 51243035  | PKHD1        | G | T | -0.00945521 | 0.00137505  | 6.1E-12    | -0.0133493  | 0.00140509 | 2.1E-21     | 0.075064479 |
| rs7145882   | 14 | 103255461 | TRAF3        | T | C | 0.0114597   | 0.00144519  | 2.2E-15    | 0.0081884   | 0.00147582 |             |             |

|             |    |           |            |   |   |             |            |            |             |            |             |             |
|-------------|----|-----------|------------|---|---|-------------|------------|------------|-------------|------------|-------------|-------------|
| rs7814267   | 8  | 5545084   | CSMD1      | A | G | -0.0055326  | 0.00178809 | 0.002      | -0.0108902  | 0.00182656 | 2.5E-09     | 0.075535317 |
| rs6679458   | 1  | 96946253  | PTBP2      | G | T | -0.0115552  | 0.00138957 | 9.1E-17    | -0.00669756 | 0.00142057 | 0.0000024   | 0.075976352 |
| rs114593013 | 3  | 84113491  | CADM2      | A | G | 0.0197179   | 0.00294476 | 2.1E-11    | 0.0115525   | 0.00301143 | 0.000012    | 0.076773733 |
| rs12454712  | 18 | 60845884  | BCL2       | T | C | -0.00811303 | 0.00141626 | 0.00000001 | -0.00602653 | 0.00144599 | 0.000031    | 0.077251569 |
| rs2157295   | 22 | 42701984  | TCF20      | T | G | -0.0049354  | 0.00141856 | 0.0005     | -0.00795969 | 0.00144757 | 0.00000038  | 0.07808564  |
| rs1436348   | 3  | 104612668 | ALCAM      | A | G | -0.00966304 | 0.00138887 | 3.5E-12    | -0.0044633  | 0.00142031 | 0.0017      | 0.079144165 |
| rs201666051 | 9  | 20920868  | FOCAD      | C | T | -0.00149182 | 0.00141899 | 0.29       | -0.00824182 | 0.0014494  | 0.000000013 | 0.079186365 |
| rs10736156  | 10 | 104019447 | GBF1       | C | A | -0.0118278  | 0.00188917 | 3.8E-10    | -0.00785032 | 0.00193013 | 0.000048    | 0.079297596 |
| rs6606686   | 12 | 110903380 | GNP3       | G | C | 0.00974754  | 0.00147061 | 3.4E-11    | 0.00596426  | 0.00150162 | 0.000071    | 0.081052194 |
| rs1582931   | 5  | 122657199 | CEP120     | G | A | 0.00965729  | 0.00138429 | 3E-12      | 0.0053046   | 0.00141467 | 0.00018     | 0.081667733 |
| rs11633022  | 15 | 73074890  | ADPGK      | C | A | -0.0108928  | 0.00144226 | 4.3E-14    | -0.00503714 | 0.00147276 | 0.00063     | 0.082135765 |
| rs74080008  | 1  | 51047717  | FAF1       | G | T | 0.00559341  | 0.00152116 | 0.00024    | 0.00901336  | 0.00155509 | 6.8E-09     | 0.082867594 |
| rs11209943  | 1  | 72750500  | NEGR1      | A | G | -0.0140816  | 0.00139655 | 6.6E-24    | -0.0183431  | 0.0014277  | 8.8E-38     | 0.083237035 |
| rs2875762   | 6  | 124925032 | NKAIN2     | G | C | -0.0110373  | 0.00160426 | 6E-12      | -0.00516927 | 0.00163931 | 0.0016      | 0.083698734 |
| rs2238435   | 16 | 4014282   | ADCY9      | C | G | -0.0141448  | 0.00141187 | 1.2E-23    | -0.0164809  | 0.00144207 | 3E-30       | 0.084845383 |
| rs34292685  | 11 | 64049021  | GPR137     | C | T | 0.0127228   | 0.00185993 | 7.9E-12    | 0.00531169  | 0.00189995 | 0.0052      | 0.087883394 |
| rs12941038  | 17 | 66509143  | PRKAR1A    | C | T | -0.00474693 | 0.00163424 | 0.0037     | -0.00954182 | 0.00166872 | 0.000000011 | 0.088939019 |
| rs6719507   | 2  | 29733801  | ALK        | G | A | 0.00301515  | 0.00137852 | 0.029      | 0.00781795  | 0.00140961 | 0.000000029 | 0.091518813 |
| rs347551    | 5  | 119389031 | PRR16      | C | G | -0.00889176 | 0.00139474 | 1.8E-10    | -0.00309272 | 0.00142535 | 0.03        | 0.092741531 |
| rs2425856   | 20 | 44911954  | CDH22      | A | G | 0.00842158  | 0.00138117 | 1.1E-09    | 0.00347821  | 0.00140974 | 0.014       | 0.093076697 |
| rs651533    | 1  | 82375561  | LPHN2      | T | A | 0.00929619  | 0.00159479 | 5.6E-09    | 0.0045563   | 0.00163036 | 0.0052      | 0.093082803 |
| rs746949    | 12 | 103658096 | C12orf42   | A | G | 0.0119345   | 0.00146505 | 3.8E-16    | 0.00801214  | 0.00149593 | 0.000000085 | 0.093270115 |
| rs28465175  | 15 | 53427155  | ONECUT1    | A | G | 0.0150381   | 0.00270111 | 2.6E-08    | 0.0123747   | 0.00275759 | 0.0000072   | 0.093748297 |
| rs4482463   | 2  | 205375909 | PARD3B     | C | A | 0.018863    | 0.00257351 | 2.3E-13    | 0.00946665  | 0.00261555 | 0.00032     | 0.097437004 |
| rs2230240   | 18 | 42597978  | SETBP1     | C | T | 0.00939729  | 0.00150477 | 4.2E-10    | 0.00272606  | 0.00153636 | 0.076       | 0.097778788 |
| rs9291816   | 5  | 63932508  | RGS7BP     | C | T | 0.00797556  | 0.0014656  | 5.3E-08    | 0.0133785   | 0.00149777 | 4.2E-19     | 0.098167921 |
| rs7749708   | 6  | 153375907 | RGS17      | C | T | -0.00998267 | 0.00150851 | 3.7E-11    | -0.00468521 | 0.00154146 | 0.0024      | 0.100679322 |
| rs10799778  | 1  | 23313353  | LACTBL1    | T | G | 0.0125819   | 0.00183897 | 7.8E-12    | 0.00705079  | 0.00187999 | 0.00018     | 0.102365214 |
| rs3129942   | 6  | 32338283  | C6orf10    | G | T | -0.00800723 | 0.00156428 | 0.00000031 | -0.013944   | 0.00159845 | 2.7E-18     | 0.103033382 |
| rs4467770   | 6  | 12086826  | HIVEP1     | G | A | -0.00986966 | 0.00155197 | 2E-10      | -0.00624841 | 0.00158587 | 0.000081    | 0.103113613 |
| rs11000993  | 10 | 76804111  | ADK        | T | C | -0.013812   | 0.00207909 | 3.1E-11    | -0.00633592 | 0.00212417 | 0.0029      | 0.104152442 |
| rs14263339  | 5  | 50932343  | ISL1       | C | T | -0.0252840  | 0.00432869 | 5.2E-09    | -0.0136122  | 0.0044237  | 0.0021      | 0.104265336 |
| rs7354849   | 1  | 232765308 | SIPA1L2    | A | G | -0.00425564 | 0.0013795  | 0.002      | -0.00817408 | 0.00141027 | 6.8E-09     | 0.107168208 |
| rs1320903   | 3  | 131758077 | CPNE4      | G | A | -0.0146157  | 0.00146919 | 2.6E-23    | -0.0100084  | 0.00150245 | 2.7E-11     | 0.107267945 |
| rs3791478   | 2  | 240064139 | HDAC4      | C | G | 0.00464182  | 0.00212479 | 0.036      | 0.0125091   | 0.00226474 | 0.000000033 | 0.110141737 |
| rs1619120   | 9  | 87302196  | NTRK2      | A | G | -0.00679342 | 0.00140193 | 0.00000013 | -0.00806432 | 0.00143197 | 0.000000018 | 0.11200225  |
| rs6843852   | 4  | 162132758 | FSTL5      | C | T | -0.00871909 | 0.00137121 | 2E-10      | -0.00476679 | 0.00140141 | 0.00067     | 0.112363875 |
| rs7672      | 16 | 68294800  | PLA2G15    | C | G | 0.00468552  | 0.00152735 | 0.0022     | 0.00900368  | 0.00156003 | 7.9E-09     | 0.113107372 |
| rs8030456   | 15 | 68076856  | MAP2K5     | C | T | 0.0183432   | 0.00163636 | 3.7E-29    | 0.0213135   | 0.00167058 | 2.8E-37     | 0.113123052 |
| rs113962925 | 17 | 46044446  | CDK5RAP3   | C | T | -0.0171085  | 0.00263645 | 8.6E-11    | -0.00894893 | 0.00269208 | 0.00089     | 0.113352695 |
| rs1381010   | 4  | 112677085 | C4orf32    | G | A | 0.00823717  | 0.00148666 | 0.00000003 | 0.00281207  | 0.00151941 | 0.064       | 0.114629306 |
| rs762705    | 3  | 50313527  | LSMED2     | A | G | 0.00721404  | 0.00191619 | 0.00017    | 0.0107589   | 0.00159597 | 0.00000004  | 0.116474486 |
| rs1296685   | 22 | 18230964  | BID        | A | G | -0.00949275 | 0.00169731 | 2.2E-08    | -0.0060927  | 0.00173202 | 0.00044     | 0.11700587  |
| rs947088    | 20 | 17171373  | PCSK2      | G | T | -0.00276977 | 0.00153011 | 0.000002   | -0.0106197  | 0.00156177 | 1E-11       | 0.118301386 |
| rs3172332   | 3  | 153973408 | ARHGEF26   | T | C | 0.00269351  | 0.00142352 | 0.058      | 0.00801043  | 0.00145575 | 0.000000037 | 0.119999088 |
| rs3125326   | 10 | 63053788  | TMEM26     | A | C | -0.00789262 | 0.00141947 | 2.7E-08    | -0.00448372 | 0.00145024 | 0.002       | 0.121732968 |
| rs3902951   | 14 | 69789755  | GALNT16    | T | G | -0.010523   | 0.00163159 | 1.1E-10    | -0.00473325 | 0.00166616 | 0.0045      | 0.122935054 |
| rs28462076  | 4  | 65696174  | TECL1      | A | G | 0.00939268  | 0.00162009 | 6.7E-09    | 0.00624026  | 0.00165578 | 0.00016     | 0.123347968 |
| rs9260164   | 6  | 29911684  | HLA-A      | C | T | -0.00985598 | 0.00157978 | 4.4E-10    | -0.0151662  | 0.00161429 | 5.7E-21     | 0.125129473 |
| rs55726687  | 12 | 991306    | WNK1       | G | A | -0.0137557  | 0.00168297 | 3E-16      | -0.0144994  | 0.00171845 | 3.2E-17     | 0.125534695 |
| rs1373349   | 18 | 62382992  | CDH7       | C | T | 0.00980624  | 0.00148041 | 3.5E-11    | 0.00212836  | 0.00151148 | 0.16        | 0.125685785 |
| rs123283    | 11 | 122809055 | C11orf63   | C | T | 0.00253327  | 0.00138144 | 0.067      | 0.00832173  | 0.00141117 | 3.7E-09     | 0.126329828 |
| rs1452991   | 6  | 141473363 | NMBR       | G | A | -0.0057654  | 0.001427   | 0.000053   | -0.010059   | 0.00145817 | 5.3E-12     | 0.127637278 |
| rs74929176  | 17 | 54905494  | C17orf67   | C | T | 0.00904667  | 0.00165261 | 4.4E-08    | 0.00503913  | 0.00168748 | 0.0028      | 0.131643435 |
| rs72917533  | 2  | 175238924 | CIR1       | T | C | 0.0114462   | 0.00176411 | 8.2E-11    | 0.00466368  | 0.0018039  | 0.0097      | 0.137015723 |
| rs12705894  | 7  | 113351252 | PPP1R3A    | G | A | 0.00780083  | 0.00138156 | 1.6E-08    | 0.00189878  | 0.00141142 | 0.18        | 0.137395137 |
| rs77560793  | 1  | 175001179 | MRPS14     | G | A | 0.0245625   | 0.00399409 | 7.8E-10    | 0.0062456   | 0.00408318 | 0.13        | 0.140501774 |
| rs7355953   | 3  | 85792137  | CADM2      | T | C | -0.0106292  | 0.00167149 | 2E-10      | -0.015159   | 0.00170933 | 7.4E-19     | 0.141443425 |
| rs8096658   | 18 | 77156537  | NFATC1     | C | G | 0.00428786  | 0.00138951 | 0.002      | 0.00902376  | 0.00141867 | 2E-10       | 0.14306836  |
| rs11642090  | 16 | 81730582  | CMIP       | T | C | -0.00728434 | 0.00142829 | 0.00000034 | -0.0117093  | 0.00145885 | 1E-15       | 0.149655912 |
| rs661878    | 11 | 29188691  | METTL15    | A | G | 0.00860245  | 0.00201805 | 0.00002    | 0.0137542   | 0.00206148 | 2.5E-11     | 0.15400519  |
| rs9480184   | 6  | 155987788 | NOX3       | C | T | -0.0098556  | 0.00168442 | 4.9E-09    | -0.00511342 | 0.00172121 | 0.003       | 0.154588252 |
| rs815163    | 1  | 190294726 | BRINP3     | T | C | 0.0107541   | 0.00137834 | 6.1E-15    | 0.00583636  | 0.00140908 | 0.000034    | 0.157123839 |
| rs4958568   | 5  | 152016093 | NMUR2      | G | A | 0.00480597  | 0.00153334 | 0.0017     | 0.00995639  | 0.00156699 | 2.1E-10     | 0.15732532  |
| rs11218510  | 11 | 121922587 | BLID       | G | A | 0.0080957   | 0.00140221 | 7.8E-09    | 0.00321674  | 0.00143238 | 0.025       | 0.158524635 |
| rs1788808   | 18 | 21090023  | NPC1       | A | G | 0.0127402   | 0.00137473 | 1.9E-20    | 0.00881097  | 0.00140358 | 3.4E-10     | 0.159980605 |
| rs2542615   | 10 | 131128952 | MGMT       | A | T | 0.00843562  | 0.00145857 | 7.3E-09    | 0.00220981  | 0.00149019 | 0.14        | 0.160731485 |
| rs4672338   | 2  | 60217457  | BCL11A     | C | T | -0.008354   | 0.00144845 | 8E-09      | -0.00460002 | 0.00148112 | 0.0019      | 0.166497588 |
| rs4792716   | 17 | 15943144  | NCOR1      | A | G | -0.00810528 | 0.0013842  | 4.8E-09    | -0.00346804 | 0.00141341 | 0.014       | 0.172003095 |
| rs1296328   | 4  | 137083193 | PCDH18     | A | C | 0.0117384   | 0.00138729 | 2.6E-17    | 0.00803962  | 0.00141785 | 0.000000014 | 0.179915715 |
| rs6029180   | 20 | 39178923  | MAFB       | A | G | -0.00818774 | 0.00147876 | 3.1E-08    | -0.00457439 | 0.00150935 | 0.0024      | 0.181901513 |
| rs12883788  | 14 | 33303540  | AKAP6      | C | T | -0.0124311  | 0.00138188 | 2.3E-19    | -0.0100392  | 0.00141116 | 1.1E-12     | 0.183477076 |
| rs10133279  | 14 | 82702712  | SEL1L      | C | T | -0.0048279  | 0.00139096 | 0.00052    | -0.00896156 | 0.00142043 | 2.8E-10     | 0.184865767 |
| rs61909165  | 11 | 134589355 | AP003062.1 | T | A | -0.012264   | 0.00182095 | 1.6E-11    | -0.0088611  | 0.00186014 | 0.0000019   | 0.187328528 |
| rs61746970  | 19 | 51132746  | SYT3       | G | A | -0.0213186  | 0.00361813 | 3.8E-09    | -0.00888319 | 0.00369372 | 0.016       | 0.187905645 |
| rs1696057   | 12 | 90776160  | CCER1      | T | C | 0.00391427  | 0.00144691 | 0.0068     | 0.00831199  | 0.00147741 | 0.000000018 | 0.188289502 |
| rs143662847 | 8  | 48804722  | PRKDC      | C | T | 0.0193182   | 0.0035338  | 4.6E-08    | 0.00931519  | 0.00360983 | 0.0099      | 0.188312042 |
| rs1199333   | 3  | 138091701 | MRAS       | G | T | 0.00932218  | 0.00176316 | 0.00000012 | 0.0135434   | 0.00180308 | 5.9E-14     | 0.189122455 |
| rs12641981  | 4  | 45179883  | GNPDA2     | C | T | -0.0186736  | 0.00138471 | 1.9E-41    | -0.0222039  | 0.00141521 | 1.8E-55     | 0.191363698 |
| rs39862     | 5  | 66185151  | MAST4      | T | C | 0.00963482  | 0.00152366 | 2.6E-10    | 0.          |            |             |             |

|             |    |           |              |   |   |  |             |            |            |             |            |             |             |
|-------------|----|-----------|--------------|---|---|--|-------------|------------|------------|-------------|------------|-------------|-------------|
| rs2735556   | 3  | 88105360  | CGGBP1       | T | C |  | 0.0129473   | 0.00214812 | 1.7E-09    | 0.017187    | 0.00219676 | 5.1E-15     | 0.191701351 |
| rs1013737   | 18 | 937050    | ADCYAP1      | G | C |  | -0.00585259 | 0.00137434 | 0.000021   | -0.0106383  | 0.00140318 | 3.4E-14     | 0.193192148 |
| rs2141004   | 2  | 6194359   | DKFZP761K232 | A | C |  | 0.00738983  | 0.00155318 | 0.000002   | 0.0100488   | 0.00158821 | 2.5E-10     | 0.195319868 |
| rs6069625   | 20 | 54747469  | MC3R         | A | G |  | 0.00872998  | 0.00155672 | 0.00000002 | 0.00357745  | 0.00158892 | 0.024       | 0.19594918  |
| rs2658797   | 11 | 93212254  | SMC04        | C | T |  | 0.00779058  | 0.00137105 | 1.3E-08    | 0.00324825  | 0.00140056 | 0.02        | 0.196949133 |
| rs67257872  | 11 | 8530218   | STK33        | A | G |  | 0.0105979   | 0.00137933 | 1.5E-14    | 0.00701931  | 0.00140901 | 0.00000063  | 0.19772073  |
| rs12187066  | 5  | 88800355  | MEF2C        | A | A |  | -0.0101906  | 0.00157523 | 9.8E-11    | -0.00598703 | 0.00160981 | 0.0002      | 0.19816282  |
| rs62425398  | 6  | 166416028 | PDE10A       | C | G |  | -0.00911641 | 0.00223532 | 0.000045   | -0.0154122  | 0.00228414 | 1.5E-11     | 0.20101218  |
| rs2268762   | 3  | 38516075  | ACVR2B       | A | G |  | -0.00438642 | 0.00140427 | 0.0018     | -0.00799477 | 0.00143606 | 0.000000026 | 0.201022199 |
| rs8038574   | 15 | 95275890  | MCTP2        | T | C |  | 0.00907367  | 0.00145054 | 4E-10      | 0.00484626  | 0.00148087 | 0.0011      | 0.205079023 |
| rs62277889  | 2  | 198783693 | PLCL1        | C | T |  | 0.0105949   | 0.00158158 | 2.1E-11    | 0.00640711  | 0.00161724 | 0.000074    | 0.205678304 |
| rs7498665   | 16 | 28883241  | SH2B1        | A | A |  | -0.0172834  | 0.00140127 | 5.9E-35    | -0.0134393  | 0.00143125 | 6E-21       | 0.209728015 |
| rs11223204  | 11 | 132625254 | OPCML        | A | G |  | -0.00873553 | 0.00138674 | 3E-10      | -0.00617047 | 0.00141658 | 0.000013    | 0.211702984 |
| rs9814758   | 3  | 123062657 | ADCY5        | T | G |  | 0.00838747  | 0.00143726 | 5.4E-09    | 0.00488837  | 0.00146979 | 0.00088     | 0.213424705 |
| rs56803094  | 15 | 99222509  | IGF1R        | A | G |  | 0.00957693  | 0.00164509 | 5.8E-09    | 0.00594203  | 0.00167949 | 0.0004      | 0.218036481 |
| rs2247401   | 15 | 53156672  | ONECUT1      | G | A |  | -0.00852417 | 0.00156151 | 4.7E-08    | -0.00407787 | 0.00159363 | 0.011       | 0.219008071 |
| rs79686965  | 11 | 46020909  | PHF21A       | A | G |  | -0.0130439  | 0.00555666 | 2.3E-08    | -0.0138044  | 0.00567623 | 0.015       | 0.226006651 |
| rs6798941   | 3  | 52893465  | TMEM110      | C | T |  | -0.0109933  | 0.00150528 | 2.7E-13    | -0.00520743 | 0.00153936 | 0.00072     | 0.228044509 |
| rs11525873  | 7  | 138817193 | TTC26        | T | C |  | 0.014829    | 0.00231302 | 1.4E-10    | 0.0175009   | 0.00236302 | 1.3E-13     | 0.229298767 |
| rs7102934   | 11 | 84648068  | DLG2         | T | C |  | -0.00907898 | 0.00149355 | 1.2E-09    | -0.00507042 | 0.00152569 | 0.00089     | 0.231950058 |
| rs4971239   | 1  | 203491150 | OPTC         | G | A |  | -0.0114876  | 0.00184196 | 4.5E-10    | -0.00942842 | 0.00188304 | 0.0000055   | 0.232025506 |
| rs148137538 | 1  | 173399677 | PRDX6        | A | G |  | 0.0250491   | 0.00457729 | 4.4E-08    | 0.0135299   | 0.00467938 | 0.0038      | 0.23976297  |
| rs8130408   | 21 | 39237138  | KCNJ6        | A | C |  | -0.00467883 | 0.00158127 | 0.0031     | -0.00901268 | 0.00161364 | 0.000000023 | 0.242323457 |
| rs200744777 | 20 | 6609610   | BMP2         | T | G |  | -0.00937915 | 0.00139283 | 1.7E-11    | -0.0121262  | 0.00142165 | 1.5E-17     | 0.249818688 |
| rs7550711   | 1  | 110082886 | GRP61        | C | A |  | -0.0426419  | 0.004316   | 5.1E-23    | -0.0484123  | 0.00441228 | 5.2E-28     | 0.250021933 |
| rs57590313  | 4  | 113323430 | ALPK1        | C | A |  | -0.0101728  | 0.00178824 | 1.3E-08    | -0.00697726 | 0.00182762 | 0.00013     | 0.251547534 |
| rs10796828  | 11 | 69490346  | ORAOV1       | T | G |  | -0.00784804 | 0.00142571 | 3.7E-08    | -0.0113389  | 0.00145639 | 6.9E-15     | 0.252511408 |
| rs78607331  | 12 | 57648644  | R3HDM2       | C | T |  | -0.0179538  | 0.00331476 | 6.1E-08    | -0.0238811  | 0.00338464 | 1.7E-12     | 0.257175046 |
| rs17399739  | 10 | 87490850  | GRID1        | A | G |  | -0.0177508  | 0.00271192 | 5.9E-11    | -0.020955   | 0.00277071 | 3.9E-14     | 0.260801988 |
| rs1402989   | 3  | 27056851  | NEK10        | C | T |  | -0.00402825 | 0.00137099 | 0.0033     | -0.00779167 | 0.00140203 | 0.000000027 | 0.262368613 |
| rs17773370  | 18 | 57951433  | MC4R         | G | A |  | -0.0158879  | 0.00276123 | 8.7E-09    | -0.0118565  | 0.00281918 | 0.000026    | 0.266858874 |
| rs41310284  | 10 | 102447647 | PAX2         | C | A |  | 0.0177406   | 0.00229148 | 9.8E-15    | 0.0206042   | 0.00234116 | 1.4E-18     | 0.267168602 |
| rs112859723 | 3  | 131625376 | CPNE4        | T | C |  | 0.0111434   | 0.00191128 | 5.5E-09    | 0.00882031  | 0.00195455 | 0.0000064   | 0.268463809 |
| rs3748126   | 7  | 76632736  | UPK3B        | C | G |  | 0.0165225   | 0.00131465 | 1.3E-19    | 0.0118622   | 0.00186222 | 1.7E-12     | 0.268627638 |
| rs9610387   | 22 | 36476762  | RBFOX2       | G | A |  | 0.00778895  | 0.00245745 | 0.0013     | 0.0137993   | 0.00250771 | 0.000000037 | 0.270266249 |
| rs2281148   | 20 | 36433288  | CTNBL1       | T | C |  | -0.00554598 | 0.00158632 | 0.00047    | -0.00979394 | 0.00161914 | 1.5E-09     | 0.270622905 |
| rs35894137  | 8  | 43071838  | HGSNAT       | C | T |  | 0.014227    | 0.00251993 | 1.6E-08    | 0.00782259  | 0.00257415 | 0.0024      | 0.270922361 |
| rs594585    | 16 | 65939803  | CDH5         | T | G |  | 0.00487033  | 0.00140994 | 0.00055    | 0.00795132  | 0.0014401  | 0.000000034 | 0.273159566 |
| rs2968973   | 4  | 130740404 | C4orf33      | C | T |  | 0.00811383  | 0.00143085 | 1.4E-08    | 0.00992715  | 0.00146237 | 1.1E-11     | 0.273526681 |
| rs6548220   | 2  | 225951    | SH3YL1       | A | G |  | 0.00935841  | 0.00148347 | 2.8E-10    | 0.00524133  | 0.00151692 | 0.00055     | 0.276509421 |
| rs113230003 | 19 | 18460956  | PGPEP1       | G | A |  | 0.0126164   | 0.00157671 | 1.2E-15    | 0.00699893  | 0.00160965 | 0.000014    | 0.280971432 |
| rs811054    | 16 | 72251132  | PMFBP1       | C | T |  | -0.00863679 | 0.00138424 | 4.4E-10    | -0.00465946 | 0.00141385 | 0.00098     | 0.286395592 |
| rs7439324   | 4  | 44501351  | KCTD8        | C | T |  | 0.00752666  | 0.00186209 | 0.000053   | 0.0107707   | 0.0019031  | 0.000000015 | 0.287707649 |
| rs5989724   | 5  | 80830788  | SSBP2        | A | G |  | 0.0114154   | 0.00159677 | 8.7E-13    | 0.00613892  | 0.00163182 | 0.00017     | 0.288704892 |
| rs13047416  | 21 | 40309436  | ETS2         | C | G |  | 0.00865747  | 0.00142161 | 1.1E-09    | 0.0123424   | 0.0014507  | 1.8E-17     | 0.291614011 |
| rs8111074   | 19 | 51776117  | SIGLEC1      | G | T |  | 0.00838998  | 0.00151756 | 3.2E-08    | 0.00601454  | 0.00154926 | 0.0001      | 0.304078732 |
| rs10969334  | 9  | 29717279  | LINGO2       | C | A |  | 0.00867165  | 0.00140574 | 6.9E-10    | 0.00633714  | 0.00143587 | 0.00001     | 0.304553404 |
| rs6601451   | 8  | 10243681  | MSRA         | A | G |  | 0.0115699   | 0.00137389 | 3.7E-17    | 0.00781386  | 0.00140345 | 0.000000026 | 0.304606637 |
| rs10790809  | 11 | 126372550 | KIRREL3      | C | G |  | -0.00656622 | 0.00138038 | 0.000002   | -0.00966875 | 0.00141008 | 7E-12       | 0.305722691 |
| rs4688359   | 3  | 61198880  | FHIT         | C | T |  | 0.010469    | 0.00141661 | 1.5E-13    | 0.0130482   | 0.00144868 | 2.1E-19     | 0.312934541 |
| rs62171698  | 2  | 14359096  | ARHGAP15     | C | A |  | -0.0120557  | 0.00196697 | 8.8E-10    | -0.00639125 | 0.00201133 | 0.0015      | 0.314524625 |
| rs538579    | 3  | 62711674  | CADPS        | G | A |  | -0.0079853  | 0.00147593 | 6.3E-08    | -0.0084219  | 0.00150934 | 0.000000024 | 0.322558606 |
| rs11134679  | 5  | 170623391 | RANBP17      | A | G |  | -0.0124028  | 0.00147968 | 5.2E-17    | -0.00860276 | 0.00151215 | 0.000000013 | 0.323487587 |
| rs17619860  | 8  | 87779603  | CNGB3        | T | C |  | -0.0104405  | 0.00186001 | 2.2E-08    | -0.00566931 | 0.00190003 | 0.0028      | 0.329240388 |
| rs630602    | 1  | 54728864  | SSBP3        | G | C |  | -0.00772636 | 0.00140837 | 4.1E-08    | -0.0101454  | 0.00143978 | 1.8E-12     | 0.337007832 |
| rs12517187  | 5  | 112444682 | MCC          | C | T |  | -0.00824621 | 0.00138786 | 2.8E-09    | -0.00450524 | 0.00141832 | 0.0015      | 0.339654761 |
| rs138329430 | 1  | 174619318 | RABGAP1L     | G | A |  | -0.0127982  | 0.00219309 | 5.4E-09    | -0.0100646  | 0.002242   | 0.0000072   | 0.342074358 |
| rs1517037   | 18 | 56878274  | GRP          | C | T |  | 0.00992268  | 0.00175754 | 1.6E-08    | 0.00703328  | 0.00179442 | 0.000089    | 0.346715769 |
| rs34778589  | 22 | 50709957  | MAPK11       | A | C |  | -0.0143368  | 0.0025     | 9.8E-09    | -0.0103151  | 0.00255113 | 0.000053    | 0.347023385 |
| rs56094641  | 16 | 53806453  | FTO          | A | G |  | -0.0465215  | 0.00139707 | 4E-243     | -0.0472597  | 0.00142696 | 1.6E-240    | 0.356936285 |
| rs10887571  | 10 | 88030441  | GRID1        | C | T |  | -0.00682159 | 0.0013894  | 0.00000091 | -0.00798055 | 0.00141952 | 0.000000019 | 0.362884726 |
| rs2450444   | 10 | 93010383  | PCGF5        | G | A |  | 0.00807358  | 0.00143771 | 0.00000002 | 0.00524032  | 0.00146889 | 0.00036     | 0.36473487  |
| rs2417998   | 9  | 111958746 | EPB41L4B     | C | G |  | 0.00841353  | 0.00151559 | 2.8E-08    | 0.00596932  | 0.00154807 | 0.00012     | 0.365991085 |
| rs10111937  | 8  | 54160092  | OPRK1        | C | T |  | -0.00490206 | 0.00149609 | 0.0011     | -0.00836953 | 0.00152827 | 0.000000043 | 0.366501416 |
| rs8117463   | 20 | 17231063  | PCSK2        | G | A |  | 0.00518926  | 0.00146851 | 0.00041    | 0.0088999   | 0.00149889 | 2.9E-09     | 0.378106465 |
| rs7536458   | 1  | 118864602 | SPAG17       | T | G |  | -0.00740047 | 0.00155402 | 0.0000019  | -0.0101185  | 0.00158868 | 1.9E-10     | 0.381042455 |
| rs10749659  | 1  | 151033979 | MLL11        | C | T |  | 0.0101834   | 0.00163239 | 4.4E-10    | 0.0063934   | 0.0016688  | 0.00013     | 0.387013605 |
| rs68015088  | 18 | 51484010  | MBD2         | G | A |  | 0.00500633  | 0.00144839 | 0.00055    | 0.00810392  | 0.00147879 | 0.000000043 | 0.390853466 |
| rs12429545  | 13 | 54102206  | OLFM4        | G | A |  | -0.0200311  | 0.00206205 | 2.6E-22    | -0.0206347  | 0.00210607 | 1.2E-22     | 0.393230202 |
| rs6870983   | 5  | 87697533  | TMEM161B     | C | T |  | 0.0137971   | 0.00167313 | 1.6E-16    | 0.0097013   | 0.00170986 | 0.000000014 | 0.394624196 |
| rs112875651 | 8  | 126506694 | TRIB1        | G | A |  | -0.00835363 | 0.00142292 | 4.3E-09    | -0.00479365 | 0.00145353 | 0.00097     | 0.396061157 |
| rs719802    | 11 | 113234679 | TTC12        | T | C |  | 0.00820044  | 0.00140746 | 5.7E-09    | 0.00391242  | 0.00143789 | 0.0065      | 0.399898646 |
| rs827803    | 3  | 157920266 | RSRC1        | G | T |  | 0.00786618  | 0.00138053 | 1.2E-08    | 0.00580979  | 0.00141178 | 0.000039    | 0.402080035 |
| rs2234458   | 11 | 65639374  | EFEMP2       | C | T |  | 0.0128189   | 0.00142617 | 2.5E-19    | 0.0125771   | 0.00145686 | 6E-18       | 0.405530475 |
| rs79236537  | 5  | 86727690  | CNHN         | C | T |  | -0.0289857  | 0.00489434 | 1E-09      | -0.0185066  | 0.00500176 | 0.00022     | 0.407248678 |
| rs8008772   | 14 | 88321884  | GALC         | A | T |  | -0.00926237 | 0.00159022 | 5.7E-09    | -0.00772414 | 0.00162392 | 0.000002    | 0.415017328 |
| rs957512    | 9  | 120405705 | TLR4         | T | C |  | 0.00879661  | 0.00146254 | 1.8E-09    | 0.0103405   | 0.00149388 | 4.5E-12     | 0.417440374 |
| rs142315514 | 1  | 1470      |              |   |   |  |             |            |            |             |            |             |             |



|             |    |           |              |   |   |             |            |            |             |            |             |              |
|-------------|----|-----------|--------------|---|---|-------------|------------|------------|-------------|------------|-------------|--------------|
| rs4739558   | 8  | 38337264  | FGFR1        | A | G | 0.00809748  | 0.00140056 | 7.4E-09    | 0.00829517  | 0.00143069 | 6.7E-09     | 0.446523149  |
| rs73982435  | 17 | 31473455  | ASIC2        | C | T | 0.00942922  | 0.00166802 | 1.6E-08    | 0.00756369  | 0.00170321 | 0.000009    | 0.465811913  |
| rs512121    | 18 | 7548501   | PTPRM        | T | C | 0.0105713   | 0.00174913 | 1.5E-09    | 0.00930527  | 0.00178584 | 0.00000019  | 0.476966036  |
| rs7453694   | 6  | 51739528  | PKHD1        | C | T | -0.00979363 | 0.00152053 | 1.2E-10    | -0.00598175 | 0.00155374 | 0.00012     | 0.477819349  |
| rs12045879  | 1  | 15817090  | CELA2B       | C | T | 0.0061829   | 0.00147365 | 0.000027   | 0.00988708  | 0.00150652 | 5.3E-11     | 0.47958885   |
| rs59714050  | 3  | 141267294 | RASA2        | T | A | -0.019371   | 0.00275265 | 2E-12      | -0.0228386  | 0.00281497 | 4.9E-16     | 0.4870535858 |
| rs1633418   | 22 | 20091756  | DGCR8        | T | C | 0.00792126  | 0.00141049 | 0.00000002 | 0.004885    | 0.00143933 | 0.00069     | 0.491327207  |
| rs3861871   | 9  | 129424719 | LMX1B        | A | G | -0.00828546 | 0.00139067 | 2.6E-09    | -0.00711657 | 0.00142047 | 0.00000054  | 0.493601675  |
| rs11496125  | 7  | 103417557 | RELN         | C | T | -0.0109238  | 0.00139455 | 4.8E-15    | -0.00854189 | 0.00142469 | 0.000000002 | 0.500013878  |
| rs7951870   | 11 | 46373311  | DGKZ         | T | C | -0.00715047 | 0.00182188 | 0.0000087  | -0.0115536  | 0.00186108 | 5.4E-10     | 0.52090774   |
| rs12798028  | 11 | 47604639  | NDUFS3       | C | T | -0.0150337  | 0.00139188 | 3.4E-27    | -0.0145642  | 0.00142183 | 1.3E-24     | 0.527357034  |
| rs559231    | 18 | 39644247  | PIK3C3       | G | T | -0.00952495 | 0.00141154 | 1.5E-11    | -0.00909768 | 0.00144117 | 2.7E-10     | 0.531546264  |
| rs73026723  | 19 | 31017177  | ZNF536       | C | T | 0.0140677   | 0.00190031 | 1.3E-13    | 0.0094854   | 0.00194001 | 0.000001    | 0.542994723  |
| rs4148155   | 4  | 89054667  | ABCG2        | A | G | 0.0143494   | 0.00125753 | 2.9E-11    | 0.00641588  | 0.0022505  | 0.0036      | 0.5456516121 |
| rs7656673   | 4  | 30840331  | PCDH7        | A | G | -0.00828306 | 0.00139847 | 3.2E-09    | -0.011556   | 0.00142927 | 6.2E-16     | 0.551539336  |
| rs3810291   | 19 | 47569003  | ZC3H4        | G | A | -0.0157949  | 0.00146479 | 4.1E-27    | -0.0147393  | 0.00149539 | 6.4E-23     | 0.571383505  |
| rs72892910  | 6  | 50816887  | TFAP2B       | G | T | -0.0252844  | 0.00181803 | 5.7E-44    | -0.0246629  | 0.00185774 | 3.2E-40     | 0.573603603  |
| rs7711823   | 5  | 158489315 | EBF1         | A | G | 0.00657182  | 0.00142907 | 0.0000043  | 0.00838771  | 0.00146043 | 9.3E-09     | 0.578259633  |
| rs34722008  | 4  | 38659594  | AC021860.1   | G | A | 0.00699237  | 0.00143592 | 0.0000011  | 0.00826538  | 0.00146755 | 0.000000018 | 0.582424518  |
| rs75706763  | 2  | 145669168 | ZEB2         | A | G | -0.0177039  | 0.00313665 | 1.7E-08    | -0.0121363  | 0.00320738 | 0.00015     | 0.586664804  |
| rs12484438  | 22 | 40558064  | TNRC6B       | T | C | 0.0128869   | 0.00145125 | 6.7E-19    | 0.0117799   | 0.00148093 | 1.8E-15     | 0.593098027  |
| rs5585481   | 2  | 219284215 | VIL1         | G | A | -0.0089689  | 0.00144403 | 5.3E-10    | -0.00815869 | 0.00147766 | 0.00000033  | 0.605224249  |
| rs11976804  | 7  | 137437156 | DGKI         | C | T | -0.00856668 | 0.00151882 | 1.7E-08    | -0.0066061  | 0.00155165 | 0.000021    | 0.610879573  |
| rs58084604  | 18 | 57849429  | MC4R         | C | T | -0.0351865  | 0.00162237 | 2.6E-104   | -0.0331788  | 0.00165642 | 3E-89       | 0.639182079  |
| rs1852006   | 7  | 77829768  | MAGI2        | G | A | 0.00883089  | 0.00143031 | 6.7E-10    | 0.00877312  | 0.00146122 | 1.9E-09     | 0.647257549  |
| rs2712667   | 12 | 99588917  | ANKS1B       | G | C | 0.00962407  | 0.00143716 | 2.1E-11    | 0.00848645  | 0.00146746 | 7.3E-09     | 0.658849548  |
| rs55896564  | 8  | 11447093  | BLK          | G | A | 0.0116966   | 0.00138218 | 2.6E-17    | 0.00911305  | 0.00141192 | 1.1E-10     | 0.680319936  |
| rs55838622  | 5  | 95711605  | PCSK1        | A | C | -0.00989605 | 0.00164361 | 1.7E-09    | -0.00673263 | 0.00167968 | 0.000061    | 0.688876447  |
| rs1422067   | 5  | 77424836  | AP3B1        | C | T | 0.00870177  | 0.00160988 | 6.5E-08    | 0.0108803   | 0.00164522 | 3.8E-11     | 0.690202603  |
| rs9922288   | 16 | 24550930  | RBBP6        | A | G | 0.00938916  | 0.00163749 | 9.8E-09    | 0.0105391   | 0.00167252 | 3E-10       | 0.692806621  |
| rs10791902  | 11 | 67093360  | SSH3         | C | T | -0.00563275 | 0.00140655 | 0.000062   | -0.00791481 | 0.00143682 | 0.00000036  | 0.696581727  |
| rs11150745  | 17 | 78757626  | RPTOR        | A | G | 0.0137948   | 0.00147616 | 9.2E-21    | 0.0121511   | 0.00150731 | 7.5E-16     | 0.702479635  |
| rs72618637  | 2  | 48953979  | GTF2A1L      | T | A | 0.0099921   | 0.00177487 | 1.8E-08    | 0.00628905  | 0.00181489 | 0.00053     | 0.705135669  |
| rs7752998   | 6  | 34398358  | RPS10        | A | T | 0.0102464   | 0.00174849 | 4.6E-09    | 0.00734414  | 0.00178668 | 0.000039    | 0.706890342  |
| rs111768603 | 3  | 42329113  | CCK          | G | T | 0.0159053   | 0.00219022 | 3.8E-13    | 0.0154313   | 0.00223981 | 5.6E-12     | 0.750423451  |
| rs7619139   | 3  | 25110415  | RARB         | T | A | -0.00884007 | 0.00139518 | 2.4E-10    | -0.00979985 | 0.00142677 | 6.5E-12     | 0.757991664  |
| rs3931548   | 9  | 103113652 | TEX10        | C | A | -0.0105077  | 0.0014385  | 2.8E-13    | -0.00540991 | 0.00146933 | 0.00023     | 0.761641771  |
| rs80082536  | 3  | 35195311  | ARPP21       | A | G | -0.0128944  | 0.00212463 | 1.3E-09    | -0.00715424 | 0.00217273 | 0.00099     | 0.771183462  |
| rs7827182   | 8  | 8380471   | SGK223       | G | C | -0.0112266  | 0.00137268 | 2.9E-16    | -0.00848727 | 0.00140221 | 1.4E-09     | 0.776826066  |
| rs4836133   | 5  | 124332103 | ZNF608       | C | A | -0.00836449 | 0.00141129 | 3.1E-09    | 0.00231309  | 0.00246539 | 0.35        | 0.786351589  |
| rs62004865  | 15 | 74207695  | LOXL1        | T | A | -0.0135621  | 0.00224169 | 1.4E-09    | -0.0117753  | 0.00228856 | 0.00000027  | 0.814628514  |
| rs7928320   | 11 | 116942753 | SIK3         | C | G | -0.0172858  | 0.00297269 | 6.1E-09    | -0.00223066 | 0.00303665 | 0.46        | 0.836253954  |
| rs59428052  | 2  | 53861389  | GPR75-ASB3   | A | G | 0.0114661   | 0.00199987 | 9.8E-09    | 0.00833123  | 0.00204497 | 0.000046    | 0.867118662  |
| rs8089514   | 18 | 69224478  | RP11-723G8.2 | T | A | -0.0081679  | 0.00143938 | 1.4E-08    | -0.00731918 | 0.00146959 | 0.00000063  | 0.876197736  |
| rs1576655   | 13 | 79587841  | RBM26        | A | C | -0.0113489  | 0.00142746 | 1.9E-15    | -0.0118472  | 0.00145793 | 4.4E-16     | 0.886607189  |
| rs12606230  | 18 | 52492252  | RAB27B       | T | C | -0.0116875  | 0.00162392 | 6.2E-13    | -0.0127194  | 0.001658   | 1.7E-14     | 0.911819108  |
| rs72673947  | 8  | 118884379 | EXT1         | A | G | -0.0140208  | 0.00223036 | 3.3E-10    | -0.0118252  | 0.00227835 | 0.00000021  | 0.923011464  |
| rs61992671  | 14 | 101531854 | AL111790.3   | A | G | 0.00988005  | 0.00143461 | 5.7E-12    | 0.00757897  | 0.001465   | 0.00000023  | 0.925555966  |
| rs62048187  | 15 | 38117049  | TMCO5A       | G | C | -0.00601476 | 0.00150076 | 0.000061   | -0.00838898 | 0.00153213 | 0.00000044  | 0.934936884  |
| rs57636386  | 18 | 58048295  | MC4R         | T | C | 0.0247018   | 0.00248459 | 2.7E-23    | 0.0235012   | 0.00253674 | 2E-20       | 0.947256486  |
| rs1423534   | 5  | 63977000  | FAM159B      | G | A | 0.00770872  | 0.00139391 | 3.2E-08    | 0.00714486  | 0.00142451 | 0.00000053  | 0.948333389  |
| rs35775580  | 7  | 130420740 | KLF14        | A | G | 0.0180149   | 0.00324057 | 2.7E-08    | 0.0132438   | 0.00331061 | 0.000063    | 0.948565676  |
| rs112253053 | 19 | 19425145  | SUGP1        | T | A | 0.013771    | 0.00186963 | 1.8E-13    | 0.0101428   | 0.00190869 | 0.00000011  | 0.967308093  |
| rs28350     | 3  | 42418446  | LYZL4        | A | G | 0.0126363   | 0.00179146 | 1.7E-12    | 0.00969738  | 0.00183201 | 0.00000012  | 0.969187358  |
| rs1834144   | 18 | 40744790  | RIT2         | C | A | 0.00792997  | 0.00142258 | 2.5E-08    | 0.00681807  | 0.00145244 | 0.00000027  | 0.990302683  |
| rs12140153  | 1  | 62579891  | INADL        | G | T | 0.0214472   | 0.00240105 | 4.2E-19    | 0.021828    | 0.0024546  | 6E-19       | 0.994017345  |
| rs9317002   | 13 | 59175727  | PCDH17       | C | A | -0.0113783  | 0.00138238 | 1.9E-16    | -0.0115024  | 0.00141189 | 3.7E-16     | 0.996218241  |

SNP - single nucleotide polymorphism identifier, Beta - effect estimate coefficient for SNP on body size, SE- standard error of the effect estimate, P - corresponding p-value

**Table S2. A summary of the genetic datasets used in this study.**

| Outcome                         | Sample size | Cases | Control | Year | Ancestry | Study                        | ICD-10 codes |
|---------------------------------|-------------|-------|---------|------|----------|------------------------------|--------------|
| Angina pectoris                 | 167333      | 14712 | 152621  | 2020 | European | FinnGen study                | I20          |
| Atherosclerosis                 | 172780      | 4937  | 167843  | 2020 | European | FinnGen study                | I70          |
| Atrial fibrillation and flutter | 114539      | 17325 | 97214   | 2020 | European | FinnGen study                | I48          |
| Coronary artery disease         | 184305      | 60801 | 123504  | 2015 | Mixed    | CARDIoGRAMplusC4D consortium |              |
| Heart failure                   | 168862      | 9576  | 159286  | 2020 | European | FinnGen study                | I50          |
| Hypertension                    | 176899      | 43576 | 133323  | 2020 | European | FinnGen study                | I10          |
| Myocardial infarction           | 171875      | 43676 | 128199  | 2015 | Mixed    | CARDIoGRAMplusC4D consortium |              |
| Peripheral artery disease       | 173166      | 5323  | 167843  | 2020 | European | FinnGen study                | I73.9        |
| Pulmonary embolism              | 176613      | 3016  | 173597  | 2020 | European | FinnGen study                | I26          |
| Pulmonary heart disease         | 176899      | 3302  | 173597  | 2020 | European | FinnGen study                | I27          |
| Stroke                          | 446696      | 40585 | 406111  | 2015 | Mixed    | MEGASTROKE consortium        |              |
| Varicose veins                  | 167879      | 13928 | 153951  | 2020 | European | FinnGen study                | I83          |

**Table S3. Inverse variance weighted method results for univariable Mendelian randomization analyses for childhood body size on cardiovascular disease outcomes.**

| <b>Outcome</b>                  | <b>F-stat</b> | <b>nSNPs</b> | <b>Beta</b> | <b>SE</b> | <b>P</b> | <b>OR</b> | <b>FDR</b> |
|---------------------------------|---------------|--------------|-------------|-----------|----------|-----------|------------|
| Angina pectoris                 | 13.6          | 302          | 0.136       | 0.093     | 0.145    | 1.145     | 0.289      |
| Atherosclerosis                 | 13.6          | 302          | 0.565       | 0.129     | 0.000    | 1.759     | 0.000      |
| Atrial fibrillation and flutter | 13.6          | 302          | 0.524       | 0.101     | 0.000    | 1.690     | 0.000      |
| Coronary heart disease          | 13.6          | 276          | 0.426       | 0.060     | 0.000    | 1.531     | 0.000      |
| Heart failure                   | 13.6          | 302          | 0.543       | 0.088     | 0.000    | 1.722     | 0.000      |
| Hypertension                    | 13.6          | 302          | 0.570       | 0.073     | 0.000    | 1.768     | 0.000      |
| Myocardial infarction           | 13.6          | 276          | 0.413       | 0.064     | 0.000    | 1.512     | 0.000      |
| Peripheral artery disease       | 13.6          | 302          | 0.637       | 0.126     | 0.000    | 1.891     | 0.000      |
| Pulmonary embolism              | 13.6          | 302          | 0.242       | 0.152     | 0.111    | 1.274     | 0.243      |
| Pulmonary heart disease         | 13.6          | 302          | 0.245       | 0.143     | 0.087    | 1.278     | 0.208      |
| Stroke                          | 13.6          | 278          | 0.039       | 0.058     | 0.502    | 1.040     | 0.635      |
| Varicose veins                  | 13.6          | 302          | 0.449       | 0.100     | 0.000    | 1.567     | 0.000      |

**Table S4. Inverse variance weighted method results for univariable Mendelian randomization analyses for adult body size on cardiovascular disease.**

| <b>Outcome</b>                  | <b>F-stat</b> | <b>nSNPs</b> | <b>Beta</b> | <b>SE</b> | <b>P</b> | <b>OR</b> |
|---------------------------------|---------------|--------------|-------------|-----------|----------|-----------|
| Angina pectoris                 | 16            | 562          | 0.389       | 0.076     | 0.000    | 1.476     |
| Atherosclerosis                 | 16            | 562          | 0.761       | 0.105     | 0.000    | 2.141     |
| Atrial fibrillation and flutter | 16            | 562          | 0.769       | 0.077     | 0.000    | 2.157     |
| Coronary heart disease          | 16            | 505          | 0.569       | 0.055     | 0.000    | 1.766     |
| Heart failure                   | 16            | 562          | 0.865       | 0.073     | 0.000    | 2.374     |
| Hypertension                    | 16            | 562          | 0.919       | 0.055     | 0.000    | 2.507     |
| Myocardial infarction           | 16            | 505          | 0.598       | 0.058     | 0.000    | 1.818     |
| Peripheral artery disease       | 16            | 562          | 0.844       | 0.101     | 0.000    | 2.326     |
| Pulmonary embolism              | 16            | 562          | 0.420       | 0.123     | 0.001    | 1.522     |
| Pulmonary heart disease         | 16            | 562          | 0.493       | 0.114     | 0.000    | 1.637     |
| Stroke                          | 16            | 511          | 0.298       | 0.050     | 0.000    | 1.347     |
| Varicose veins                  | 16            | 562          | 0.414       | 0.072     | 0.000    | 1.513     |

**Table S5. Weighted median results for univariable Mendelian randomization analyses for childhood and adult body size on cardiovascular disease outcomes.**

| <b>Exposure</b>  | <b>Outcome</b>                  | <b>nSNPs</b> | <b>Beta</b> | <b>SE</b> | <b>P</b> | <b>OR</b> |
|------------------|---------------------------------|--------------|-------------|-----------|----------|-----------|
| Age 10 body size | Angina pectoris                 | 302          | 0.326       | 0.156     | 0.036    | 1.386     |
| Age 10 body size | Atherosclerosis                 | 302          | 0.571       | 0.205     | 0.005    | 1.770     |
| Age 10 body size | Atrial fibrillation and flutter | 302          | 0.430       | 0.153     | 0.005    | 1.538     |
| Age 10 body size | Coronary heart disease          | 276          | 0.487       | 0.089     | 0.000    | 1.627     |
| Age 10 body size | Heart failure                   | 302          | 0.605       | 0.151     | 0.000    | 1.832     |
| Age 10 body size | Hypertension                    | 302          | 0.634       | 0.095     | 0.000    | 1.885     |
| Age 10 body size | Myocardial infarction           | 276          | 0.519       | 0.106     | 0.000    | 1.681     |
| Age 10 body size | Peripheral artery disease       | 302          | 0.482       | 0.188     | 0.010    | 1.619     |
| Age 10 body size | Pulmonary embolism              | 302          | 0.433       | 0.255     | 0.090    | 1.542     |
| Age 10 body size | Pulmonary heart disease         | 302          | 0.495       | 0.236     | 0.036    | 1.641     |
| Age 10 body size | Stroke                          | 278          | 0.013       | 0.090     | 0.886    | 1.013     |
| Age 10 body size | Varicose veins                  | 302          | 0.707       | 0.141     | 0.000    | 2.027     |
| Adult body size  | Angina pectoris                 | 562          | 0.384       | 0.128     | 0.003    | 1.469     |
| Adult body size  | Atherosclerosis                 | 562          | 0.662       | 0.163     | 0.000    | 1.939     |
| Adult body size  | Atrial fibrillation and flutter | 562          | 0.841       | 0.122     | 0.000    | 2.319     |
| Adult body size  | Coronary heart disease          | 505          | 0.639       | 0.087     | 0.000    | 1.895     |
| Adult body size  | Heart failure                   | 562          | 0.846       | 0.133     | 0.000    | 2.331     |
| Adult body size  | Hypertension                    | 562          | 1.057       | 0.076     | 0.000    | 2.876     |
| Adult body size  | Myocardial infarction           | 505          | 0.578       | 0.088     | 0.000    | 1.782     |
| Adult body size  | Peripheral artery disease       | 562          | 0.774       | 0.166     | 0.000    | 2.168     |
| Adult body size  | Pulmonary embolism              | 562          | 0.579       | 0.214     | 0.007    | 1.783     |
| Adult body size  | Pulmonary heart disease         | 562          | 0.767       | 0.207     | 0.000    | 2.152     |
| Adult body size  | Stroke                          | 511          | 0.226       | 0.078     | 0.004    | 1.253     |
| Adult body size  | Varicose veins                  | 562          | 0.562       | 0.116     | 0.000    | 1.755     |

**Table S6. MR-Egger results for univariable Mendelian randomization analyses for childhood and adult body size on cardiovascular disease outcomes.**

| Exposure         | Outcome                         | nSNPs | Beta   | SE    | P     | OR    |
|------------------|---------------------------------|-------|--------|-------|-------|-------|
| Age 10 body size | Angina pectoris                 | 302   | 0.234  | 0.215 | 0.277 | 1.264 |
| Age 10 body size | Atherosclerosis                 | 302   | 1.180  | 0.297 | 0.000 | 3.253 |
| Age 10 body size | Atrial fibrillation and flutter | 302   | 0.391  | 0.233 | 0.095 | 1.478 |
| Age 10 body size | Coronary heart disease          | 276   | 0.554  | 0.137 | 0.000 | 1.741 |
| Age 10 body size | Heart failure                   | 302   | 0.554  | 0.203 | 0.007 | 1.740 |
| Age 10 body size | Hypertension                    | 302   | 0.766  | 0.169 | 0.000 | 2.150 |
| Age 10 body size | Myocardial infarction           | 276   | 0.650  | 0.145 | 0.000 | 1.916 |
| Age 10 body size | Peripheral artery disease       | 302   | 1.132  | 0.291 | 0.000 | 3.102 |
| Age 10 body size | Pulmonary embolism              | 302   | -0.172 | 0.351 | 0.623 | 0.842 |
| Age 10 body size | Pulmonary heart disease         | 302   | -0.030 | 0.331 | 0.927 | 0.970 |
| Age 10 body size | Stroke                          | 278   | 0.069  | 0.132 | 0.603 | 1.071 |
| Age 10 body size | Varicose veins                  | 302   | 0.475  | 0.231 | 0.040 | 1.609 |
| Adult body size  | Angina pectoris                 | 562   | 0.493  | 0.221 | 0.026 | 1.636 |
| Adult body size  | Atherosclerosis                 | 562   | 1.244  | 0.303 | 0.000 | 3.471 |
| Adult body size  | Atrial fibrillation and flutter | 562   | 0.749  | 0.224 | 0.001 | 2.114 |
| Adult body size  | Coronary heart disease          | 505   | 0.877  | 0.165 | 0.000 | 2.403 |
| Adult body size  | Heart failure                   | 562   | 1.087  | 0.210 | 0.000 | 2.966 |
| Adult body size  | Hypertension                    | 562   | 1.177  | 0.160 | 0.000 | 3.245 |
| Adult body size  | Myocardial infarction           | 505   | 0.814  | 0.173 | 0.000 | 2.258 |
| Adult body size  | Peripheral artery disease       | 562   | 1.285  | 0.291 | 0.000 | 3.614 |
| Adult body size  | Pulmonary embolism              | 562   | 0.838  | 0.355 | 0.019 | 2.311 |
| Adult body size  | Pulmonary heart disease         | 562   | 1.062  | 0.329 | 0.001 | 2.891 |
| Adult body size  | Stroke                          | 511   | 0.110  | 0.149 | 0.461 | 1.116 |
| Adult body size  | Varicose veins                  | 562   | 0.745  | 0.209 | 0.000 | 2.107 |

**Table S7. Inverse variance weighted method results for multivariable Mendelian randomization analyses for childhood and adult body size on cardiovascular disease outcomes.**

| Exposure         | Outcome                         | nSNPs | Beta   | SE    | OR    | LCI   | UCI   | P     |
|------------------|---------------------------------|-------|--------|-------|-------|-------|-------|-------|
| Age 10 body size | Angina pectoris                 | 263   | -0.175 | 0.124 | 0.839 | 0.657 | 1.071 | 0.159 |
| Age 10 body size | Atherosclerosis                 | 263   | 0.125  | 0.172 | 1.133 | 0.808 | 1.589 | 0.468 |
| Age 10 body size | Atrial fibrillation and flutter | 263   | -0.095 | 0.129 | 0.910 | 0.707 | 1.171 | 0.462 |
| Age 10 body size | Coronary heart disease          | 241   | 0.053  | 0.088 | 1.054 | 0.886 | 1.254 | 0.551 |
| Age 10 body size | Heart failure                   | 263   | -0.142 | 0.117 | 0.867 | 0.689 | 1.091 | 0.224 |
| Age 10 body size | Hypertension                    | 263   | -0.042 | 0.092 | 0.959 | 0.801 | 1.149 | 0.650 |
| Age 10 body size | Myocardial infarction           | 241   | -0.018 | 0.092 | 0.983 | 0.820 | 1.178 | 0.848 |
| Age 10 body size | Peripheral artery disease       | 263   | 0.219  | 0.167 | 1.245 | 0.899 | 1.726 | 0.188 |
| Age 10 body size | Pulmonary embolism              | 263   | -0.022 | 0.201 | 0.979 | 0.660 | 1.451 | 0.915 |
| Age 10 body size | Pulmonary heart disease         | 263   | -0.078 | 0.186 | 0.925 | 0.642 | 1.332 | 0.676 |
| Age 10 body size | Stroke                          | 243   | -0.271 | 0.080 | 0.762 | 0.652 | 0.892 | 0.001 |
| Age 10 body size | Varicose veins                  | 263   | 0.157  | 0.126 | 1.170 | 0.915 | 1.496 | 0.211 |
| Adult body size  | Angina pectoris                 | 522   | 0.512  | 0.106 | 1.669 | 1.357 | 2.054 | 0.000 |
| Adult body size  | Atherosclerosis                 | 522   | 0.694  | 0.147 | 2.002 | 1.502 | 2.669 | 0.000 |
| Adult body size  | Atrial fibrillation and flutter | 522   | 0.832  | 0.109 | 2.298 | 1.854 | 2.848 | 0.000 |
| Adult body size  | Coronary heart disease          | 472   | 0.542  | 0.077 | 1.719 | 1.479 | 1.997 | 0.000 |
| Adult body size  | Heart failure                   | 522   | 0.949  | 0.100 | 2.584 | 2.126 | 3.140 | 0.000 |
| Adult body size  | Hypertension                    | 522   | 0.942  | 0.078 | 2.565 | 2.200 | 2.990 | 0.000 |
| Adult body size  | Myocardial infarction           | 472   | 0.614  | 0.080 | 1.848 | 1.580 | 2.162 | 0.000 |
| Adult body size  | Peripheral artery disease       | 522   | 0.713  | 0.142 | 2.041 | 1.546 | 2.693 | 0.000 |
| Adult body size  | Pulmonary embolism              | 522   | 0.474  | 0.171 | 1.607 | 1.150 | 2.246 | 0.005 |
| Adult body size  | Pulmonary heart disease         | 522   | 0.573  | 0.158 | 1.773 | 1.300 | 2.419 | 0.000 |
| Adult body size  | Stroke                          | 476   | 0.444  | 0.069 | 1.559 | 1.361 | 1.785 | 0.000 |
| Adult body size  | Varicose veins                  | 522   | 0.313  | 0.107 | 1.367 | 1.109 | 1.685 | 0.003 |
